# Supplementary material for: Caring for children with new medical technology at home: parental perspectives
Source: PubMed Central journal article supplement — BMJ Paediatr Open. 2023 Oct 20;7(1):e002062. doi: 10.1136/bmjpo-2023-002062 (PMC10603509; doi:10.1136/bmjpo-2023-002062), 2023-10-20
Supplement: bmjpo-2023-002062.draft_revisions.pdf [file bmjpo-2023-002062.draft_revisions.pdf]

# BMJ Paediatrics Open

BMJ Paediatrics Open is committed to open peer review. As part of this commitment we make the peer review history of every article we publish publicly available.

When an article is published we post the peer reviewers' comments and the authors' responses online. We also post the versions of the paper that were used during peer review. These are the versions that the peer review comments apply to.

The versions of the paper that follow are the versions that were submitted during the peer review process. They are not the versions of record or the final published versions. They should not be cited or distributed as the published version of this manuscript.

BMJ Paediatrics Open is an open access journal and the full, final, typeset and author-corrected version of record of the manuscript is available on our site with no access controls, subscription charges or pay-per-view fees (<http://bmjpaedsopen.bmj.com>).

If you have any questions on BMJ Paediatrics Open's open peer review process please email [info.bmjpo@bmj.com](mailto:info.bmjpo@bmj.com)

# BMJ Paediatrics Open

## Bringing it all home: the experience of family caregivers caring for children with new medical technology at home

|                               |                                                                                                                                                                                                                                                                                                                                                                                                                                                                                                                                                                                                                                                                          |
|-------------------------------|--------------------------------------------------------------------------------------------------------------------------------------------------------------------------------------------------------------------------------------------------------------------------------------------------------------------------------------------------------------------------------------------------------------------------------------------------------------------------------------------------------------------------------------------------------------------------------------------------------------------------------------------------------------------------|
| Journal:                      | <i>BMJ Paediatrics Open</i>                                                                                                                                                                                                                                                                                                                                                                                                                                                                                                                                                                                                                                              |
| Manuscript ID                 | bmjpo-2023-002062                                                                                                                                                                                                                                                                                                                                                                                                                                                                                                                                                                                                                                                        |
| Article Type:                 | Original research                                                                                                                                                                                                                                                                                                                                                                                                                                                                                                                                                                                                                                                        |
| Date Submitted by the Author: | 08-May-2023                                                                                                                                                                                                                                                                                                                                                                                                                                                                                                                                                                                                                                                              |
| Complete List of Authors:     | Pitch, Natalie; University of Toronto Temerty Faculty of Medicine, Medicine<br>Shahil, Anam; University of Toronto Institute of Health Policy Management and Evaluation<br>Mekhuri, Samantha; The Hospital for Sick Children, Respiratory Medicine<br>Ambreen, Munazzah; The Hospital for Sick Children<br>Chu, Stephanie; The Hospital for Sick Children<br>Keilty, Krista; Hospital for Sick Children, Paediatrics; University of Toronto Lawrence S Bloomberg Faculty of Nursing,<br>Cohen, Eyal; Hospital for Sick Children, Division of Pediatric Medicine<br>Orkin, Julia; The Hospital for Sick Children, Paediatrics<br>Amin, Reshma; Hospital for Sick Children |
| Keywords:                     | Qualitative research, Technology                                                                                                                                                                                                                                                                                                                                                                                                                                                                                                                                                                                                                                         |
|                               |                                                                                                                                                                                                                                                                                                                                                                                                                                                                                                                                                                                                                                                                          |

SCHOLARONE™  
Manuscripts

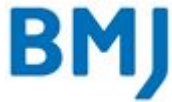

I, the Submitting Author has the right to grant and does grant on behalf of all authors of the Work (as defined in the below author licence), an exclusive licence and/or a non-exclusive licence for contributions from authors who are: i) UK Crown employees; ii) where BMJ has agreed a CC-BY licence shall apply, and/or iii) in accordance with the terms applicable for US Federal Government officers or employees acting as part of their official duties; on a worldwide, perpetual, irrevocable, royalty-free basis to BMJ Publishing Group Ltd ("BMJ") its licensees and where the relevant Journal is co-owned by BMJ to the co-owners of the Journal, to publish the Work in this journal and any other BMJ products and to exploit all rights, as set out in our [licence](#).

The Submitting Author accepts and understands that any supply made under these terms is made by BMJ to the Submitting Author unless you are acting as an employee on behalf of your employer or a postgraduate student of an affiliated institution which is paying any applicable article publishing charge ("APC") for Open Access articles. Where the Submitting Author wishes to make the Work available on an Open Access basis (and intends to pay the relevant APC), the terms of reuse of such Open Access shall be governed by a Creative Commons licence – details of these licences and which [Creative Commons](#) licence will apply to this Work are set out in our licence referred to above.

Other than as permitted in any relevant BMJ Author's Self Archiving Policies, I confirm this Work has not been accepted for publication elsewhere, is not being considered for publication elsewhere and does not duplicate material already published. I confirm all authors consent to publication of this Work and authorise the granting of this licence.

1  
2  
3 **Bringing it all home: the experience of family caregivers caring for children**  
4 **with new medical technology at home**  
5  
6

7 **Short title:** Bringing it all home  
8

9 Natalie Pitch\*<sup>1</sup>, BSc

10 Anam Shahil<sup>1,2\*</sup>, BSc, MSc

11 Samantha Mekhuri<sup>1</sup>, MHSc

12 Munazzah Ambreen<sup>1</sup>, MBBS, MSc

13 Stephanie Chu<sup>3,4</sup>, RN, BScN, MN

14 Krista Keilty<sup>3,4</sup>, PhD

15 Eyal Cohen<sup>2,5,6,7,8,9</sup>, MD, MSc, FRCPC

16 Julia Orkin<sup>2,5,6,7</sup>, MD, MSc, FRCPC

17 Reshma Amin<sup>1,2,6,7</sup>, MD, MSc, FRCPC  
18  
19

20  
21 \*Authors contributed equally  
22

23 **Author Affiliations:**

24 <sup>1</sup>Division of Respiratory Medicine, Department of Pediatrics, The Hospital for Sick Children,  
25 Toronto, Canada

26 <sup>2</sup>Institute of Health Policy, Management, and Evaluation, University of Toronto, Toronto,  
27 Canada

28 <sup>3</sup>Connected Care, The Hospital for Sick Children, University of Toronto, Canada

29 <sup>4</sup>Lawrence S. Bloomberg Faculty of Nursing, University of Toronto, Toronto, Ontario

30 <sup>5</sup> Division of Pediatric Medicine, The Hospital for Sick Children, Toronto, Canada

31 <sup>6</sup> Department of Pediatrics, University of Toronto, Toronto Canada

32 <sup>7</sup> Child Health Evaluative Sciences, SickKids Research Institute, Toronto, Canada

33 <sup>8</sup> CanChild Centre for Childhood Disability Research, McMaster University, Hamilton, Ontario,  
34 Canada

35 <sup>9</sup> Edwin S.H. Leong Centre for Healthy Children, University of Toronto, Toronto, Ontario,  
36 Canada  
37  
38  
39

40 **Address correspondence to:** Reshma Amin, MD, MSc, Division of Respiratory Medicine,  
41 Department of Pediatrics, The Hospital for Sick Children, 4539 Hill Wing, 555  
42 University Ave, Toronto, Ontario. M5G 1X8. E-mail: [reshma.amin@sickkids.ca](mailto:reshma.amin@sickkids.ca)  
43  
44

45 **Conflict of Interest Disclosures (includes financial disclosures):** No potential conflicts of  
46 interest to disclose.  
47

48 **Funding/Support:** Funded by the Canadian Institute for Health Research grant number TEG  
49 165590  
50

51 **Role of Funder/Sponsor (if any):** N/A  
52  
53  
54  
55  
56  
57  
58  
59  
60

**ABSTRACT:**

**Objectives:** A novel education program that provides personalized, competency-based training using simulation was introduced for family caregivers (FCs) of children with medical complexity (CMC) being initiated on new medical technology in the hospital. This study explored FCs' experiences from the time their child was initiated on medical technology in the hospital to when they were discharged home and transitioning to new daily life.

**Study design:** A qualitative descriptive approach was used to conduct and analyze 14 semi-structured interviews with a group of FCs composed of 11 mothers and 3 fathers. Content analysis was used to analyze transcripts of the caregiver interviews. The study was conducted at a tertiary pediatric hospital in Toronto, Canada.

**Results:** Our study revealed three main themes: FC's response and readiness for medical technology use, the value of education and transition support for initiation of new medical technology, and the challenges associated with managing new medical technology in the home. FCs expressed emotional distress related to coping with the realization that their child required medical technology. Although the theoretical and hands-on practice training instilled confidence in families, FCs reported feeling overwhelmed when they transitioned home with new medical technology. Finally, FCs reported significant psychological, emotional, and financial challenges while caring for their technology-dependent child.

**Conclusions:** Our study reveals the unique challenges faced by FCs who care for technology-dependent children. These findings highlight the need to implement a comprehensive education and transition program that provides longitudinal support for all aspects of care.

**What is already known on this topic:**

- Family caregivers of technology-dependent CMC experience several challenges in their transition home from hospital, especially related to medical technology complications

**What this study adds:**

- A training program that combines theoretical and hands-on learning can increase family caregivers' confidence in managing medical technology at home
- Family caregivers of children who are initiated on medical technology in hospital desire having more robust support following their discharge home as they adapt to new life

**How this study might affect research, practice or policy**

- There is a critical need to develop comprehensive education programs for family caregivers whose children are initiated on medical technology in hospital
- Educational and psychosocial supports should be available during the disclosure of the need for medical technology, training process, transition home, and post-discharge period

## Introduction

Children with medical complexity are a growing population due to advancements in medical care and home technologies without which they would not have survived previously.<sup>1-3</sup> CMC are a group of diagnostically heterogeneous children whom are united by multiple chronic conditions, significant functional limitations, and dependence on technology.<sup>4</sup> CMC and their family caregivers (FCs) endure enormous challenges, including prolonged hospitalizations, poor care coordination, and caregiver burden.<sup>4-6</sup> Due to their underlying medical fragility, CMC often are frequent users of the healthcare system and experience significant morbidity and mortality.<sup>3-7</sup>

Families of CMC have reported that transitioning from hospital to home with technology-dependent children can be demanding because of the involvement of multiple healthcare providers and services.<sup>8,9</sup> This transition experience is especially heightened by the addition of new medical technology such as tracheostomies, ventilators, and feeding tubes. A substantial amount of emergency department visits and hospital encounters in CMC are related to medical technology complications soon after technology initiation.<sup>10-12</sup> It has been postulated that several technology-related complications could be prevented or managed at home with appropriate support and action plans.

Previous research has shown that interventions aimed at enhancing the competency and confidence of FCs in managing new medical technology resulted in improved overall experiences of FCs and reduced psychological distress.<sup>13,14</sup> For instance, a discharge coaching model for CMC decreased hospitalization and overall cost per patient, thereby signalling that discharge interventions in this population have the potential for system-wide improvement.<sup>15</sup>

To improve the quality of life of technology-dependent CMC and their FCs, there is a critical need to gain a deeper understanding of whether innovation in education is meeting their

1  
2  
3 needs with medical technology. This study has been conducted as part of a larger prospective  
4 observational study to evaluate the impact of a training program called Connected Care on acute  
5  
6 healthcare utilization and the experiences of technology-dependent CMC, their families, and  
7  
8 home healthcare providers. The aim of this qualitative study was to explore FCs' experiences  
9  
10 with caring for CMC who are initiated on medical technology during a hospital admission. We  
11  
12 sought to understand their experiences undergoing the training program in hospital as well as  
13  
14 throughout the process of being discharged and transitioning to new daily life at home.  
15  
16  
17  
18

## 19 **METHODS**

### 20 **Study Design**

21  
22 We conducted a qualitative descriptive study using semi-structured interviews with FCs.  
23  
24 Data were collected between December 2020 and May 2022. Institutional research board  
25  
26 approval was obtained [Research Ethics Board number 1000064641]. A subset of primary FCs  
27  
28 already enrolled in a prospective, observational study to evaluate the Connected Care Program  
29  
30 were invited to participate in this qualitative study via phone call. FCs were eligible for study  
31  
32 inclusion if they (1) had CMC who were newly initiated (in-hospital) on new medical technology  
33  
34 such as enterostomy tubes, respiratory technology, and vascular access (e.g., peripherally  
35  
36 inserted central catheter (PICC line), port-a-catheter); (2) could read, write, and understand  
37  
38 English, and (3) provide informed consent for study participation. The definition of CMC for  
39  
40 study inclusion is a child with complex chronic conditions and/or neurologic impairment  
41  
42 requiring specialized care, substantial healthcare needs, functional limitations, and high  
43  
44 healthcare resource utilization.<sup>3</sup> The maximum variation sampling technique was used to ensure  
45  
46 representation from FCs of CMC across a range of social strata with diverse child and family  
47  
48  
49  
50  
51  
52  
53  
54  
55  
56  
57  
58  
59  
60



1  
2  
3 characteristics. Written voluntary consent was provided before study enrollment. Participants  
4  
5 were informed that they have the right to withdraw from the study at any time without penalty.  
6

### 7 8 **Connected Care Program**

9  
10 The Connected Care Program is located at Canada's largest pediatric hospital, The  
11  
12 Hospital for Sick Children, and was developed to support transitions from hospital to home and  
13  
14 improve pediatric homecare for CMC, their families and healthcare providers.<sup>16</sup> Please refer to  
15  
16 Supplementary Material 1 for a full description of the Connected Care Program.  
17  
18

### 19 **Data Collection**

20  
21 Health records were retrospectively reviewed for study participants' children for the  
22  
23 following: child's age, gender, single primary medical diagnosis, and medical  
24  
25 technology/technologies initiated. A demographic questionnaire was administered to FCs to  
26  
27 collect their age, gender, level of education, employment status and average distance to hospital.  
28  
29 Qualitative data collection included individual semi-structured interviews that were scheduled 3-  
30  
31 6 following discharge from hospital with new technology. Interview guides were developed  
32  
33 iteratively by the research team after a review of relevant literature and consultation with content  
34  
35 experts (see Supplementary Material 2). The interview guide explored the experiences and  
36  
37 perspectives of FCs' regarding their: 1) responses to the first disclosure of medical technology,  
38  
39 2) experiences in managing the care for a child dependent on medical technology, 3) knowledge,  
40  
41 impacts, facilitators and barriers of education programming; and 4) access and usefulness of  
42  
43 supports in managing care for their child with new medical technology beyond discharge/in  
44  
45 homecare. Interviews were conducted by a female medical student with formal training in  
46  
47 qualitative research (NP). There was no relationship established prior to study commencement.  
48  
49  
50  
51  
52  
53  
54  
55  
56  
57  
58  
59  
60

1  
2  
3 The interviews were conducted online via Zoom Video Communications teleconference platform  
4  
5 or by phone as per participant preference.  
6

## 7 8 **Data Analysis** 9

10 Interviews were recorded, transcribed verbatim, and de-identified by a professional  
11 transcriptionist. Qualitative data analysis software (NVivo 12 Plus) was used for data and coding  
12 management. Conventional content analysis was used to analyze the transcripts.<sup>17</sup> The inductive,  
13 4-step content-analysis process was conducted to identify, code, and categorize predominant  
14 themes from the text. First, all the transcripts were read several times by three independent  
15 reviewers (AS, NP, and RA) to identify initial patterns and recurring categories. Second, two  
16 reviewers independently coded all the interview transcripts (AS, NP). This step involved the  
17 creation of several codes and their application over the volume of interviews by two independent  
18 reviewers. Third, similar codes were grouped into categories and sub-themes and later categories  
19 and sub-themes were grouped under major themes. Finally, the main themes and sub-themes  
20 were discussed among the reviewers (AS, NP, RA) until agreement on the themes was achieved  
21 and reflected the entire dataset. Methodologic rigor was established through prolonged  
22 engagement and peer debriefing, and according to The Consolidated Criteria for Reporting  
23 Qualitative Research (Supplementary Material 3). After 14 interviews, recruitment was closed  
24 because data saturation was reached, defined as the point when additional data did not lead to the  
25 emergence of new themes.<sup>18</sup> Transcripts were not returned to participants; however, they were  
26 provided a description of the coding framework.  
27  
28  
29  
30  
31  
32  
33  
34  
35  
36  
37  
38  
39  
40  
41  
42  
43  
44  
45  
46  
47  
48  
49  
50  
51  
52  
53  
54  
55  
56  
57  
58  
59  
60

## RESULTS

A total of 34 eligible participants were approached by the study team, of which 14 FCs of CMC agreed to participate. The 20 participants who declined participation in the study reported that they did not have time for an interview (n=13), or they did not want to participate in additional research-related activities (n=7). The demographic information for the FCs is shown in Table 1. Of the 14 semi-structured interviews conducted, 3 were with fathers and 11 were with mothers. Each of these interviews lasted between 30 and 60 minutes. The demographic and clinical information for the children of participating FCs is also shown in Table 1.

### **Framework for Experiences of Family Caregivers of Children with New Medical Technology at Home**

Based on the content analysis, three overarching themes emerged from the interviews: (1) FCs' response and readiness for medical technology use; (2) the value of education and transition support for initiation of new medical technology; (3) the challenges associated with managing new medical technology in the home. The themes and sub-themes are summarized in Table 2 with illustrative quotes.

#### ***1. Family Caregivers' Response and Readiness for Medical Technology Use***

##### ***1.1 Family caregivers' initial reaction to first disclosure by the healthcare team***

Most FCs reported experiencing emotional distress in response to the first disclosure of their child's need for medical technology. Some expressed feeling nervous and emotional while others felt shocked and scared by the idea of their child being dependent on medical technology. Many felt hesitant about the decision to proceed with medical technology because of the fear associated with caregiving responsibilities and risks. Even knowing they would receive

1  
2  
3 education, some FCs felt that they would not be capable of managing the technology. Some of  
4 those who were initially hesitant about starting their child on technology noted feeling reassured  
5 and more accepting of the technology following additional discussions with the healthcare team.  
6  
7  
8  
9

## 10 1.2 Family caregivers' attitude towards participating in training program

11  
12 Nearly all FCs expressed feeling very anxious about the prospect of learning how to use  
13 the technology. Some initially expressed not wanting to do the training altogether, believing that  
14 they would not be capable of learning to manage at home. They expressed fear related to the  
15 learning process and undertaking tasks normally done by healthcare professionals. One FC  
16 whose child previously had a tracheostomy had panic attacks from the thought of having to  
17 complete tracheostomy changes. Another FC noted feeling like she was not able to absorb the  
18 information well during training because she was so overwhelmed by her child's admission.  
19  
20  
21  
22  
23  
24  
25  
26  
27

## 28 ***2. The value of education and transition support for initiation of new medical technology***

### 29 2.1 Experience of learning medical technology

30  
31  
32  
33 FCs felt that the education they received played a significant role in improving their  
34 knowledge of medical technology. They received both theoretical knowledge of the skills and  
35 hands-on training using mannequins, both of which provided the opportunity to learn various  
36 scenarios associated with technology as well as potential complications that could arise. Some  
37 FCs appreciated that the educational material was provided in plain language without medical  
38 jargon. FCs also noted that the nurse educators who were teaching provided them the flexibility  
39 to learn at their own pace and the opportunity to ask as many questions as they needed. Many  
40 FCs appreciated the registered nurses and respiratory therapists for providing supplemental  
41 information and training support at the bedside.  
42  
43  
44  
45  
46  
47  
48  
49  
50  
51  
52  
53  
54  
55  
56  
57  
58  
59  
60

1  
2  
3 A few FCs provided suggestions to improve the overall learning experience including  
4 adjusting the speed of sessions according to participant level of understanding and learning pace  
5  
6 as well as the development of additional training materials and recorded sessions in the take-  
7  
8 home education package for quick reference. A few FCs reported that the educational material  
9  
10 was too long with too much content to absorb in one session.  
11  
12  
13

## 14 15 16 2.2 Access to education and transition support for medical technology management

17  
18 Most FCs reported adequate access to education and training support. Many received  
19  
20 virtual follow-up visits from the program, which helped them in understanding the use of  
21  
22 supplies in the home environment and responding to medical complications in real time.  
23  
24 However, some FCs felt the program was not accessible to their partners and extended family  
25  
26 members due to restrictions imposed by the COVID-19 pandemic. One FC mentioned it was  
27  
28 difficult to participate in training because additional caregivers were not allowed in hospital  
29  
30 during the pandemic to care for her son, making it challenging to participate in the classes.  
31  
32 Another FC expressed wishing there was more flexible access to enable others at home also  
33  
34 access to the program. FCs suggested expanded access with virtual sessions to be available to  
35  
36 other groups of FCs such as partners, siblings, grandparents as well as patients (i.e., medically  
37  
38 complex children) if they were willing to learn. To improve transition support, some FCs who  
39  
40 did not receive them suggested the implementation of standardized longitudinal follow-up visits  
41  
42 from members of the training program following discharge to ensure FCs are coping well.  
43  
44  
45  
46  
47

## 48 ***3. The challenges associated with managing new medical technology in the home***

### 49 50 3.1 The initial transition home

51  
52 FCs reported feeling stressed by the process of transitioning their child from hospital to  
53  
54 home with new technology. They highlighted that returning home was a sudden change as they  
55  
56  
57  
58  
59  
60

1  
2  
3 had been accustomed to a hospital environment where there is constant nursing care and support  
4 from the healthcare team. An added challenge at home was safety and FCs worried about  
5 ensuring that siblings did not disrupt or interfere with the medical technology. Further, a couple  
6 of FCs noted that they had difficulty ordering supplies or accessing different equipment at home  
7 compared to what they received training within hospital, making the transition more stressful.  
8  
9  
10  
11  
12  
13  
14  
15 Some FCs felt they did not have adequate support at home on their first day of discharge.

16  
17 A few FCs mentioned strategies that they used to stay organized at home after discharge  
18 such as following a timetable, setting up stations for feeding, stocking up equipment, and  
19 dividing responsibilities among FCs at home. Even with these strategies, most FCs felt  
20 overwhelmed by the demands of managing the technology. For instance, one FC stated being  
21 overwhelmed because she had to spend an entire day observing her child to ensure that they did  
22 not pull out their tubes or throw up after feeding.  
23  
24  
25  
26  
27  
28  
29

### 30 3.2 Difficulties dealing with emergencies and medical complications

31  
32  
33 FCs also recounted their experiences of managing emergencies and medical  
34 complications at home. Common scenarios discussed included site infections, equipment  
35 malfunction, or difficulty with technology insertion/replacement. FCs reported feeling stressed  
36 and frustrated while trying to navigate these situations. A few FCs expressed not having  
37 adequate experience with tasks that are required to manage certain complications. Additionally,  
38 they expressed the need for more support in making the decision when to seek emergency care,  
39 especially given the distance that they live from the hospital. Many FCs mentioned that they do  
40 not have a clear point of contact for emergencies after discharge. They suggested that the  
41 hospital should provide clear contact information and/or set up a virtual platform to connect  
42 healthcare providers directly to FCs in such situations.  
43  
44  
45  
46  
47  
48  
49  
50  
51  
52  
53  
54  
55  
56  
57  
58  
59  
60

### 3.3 Increased emotional and financial burden among family caregivers

FCs also highlighted the exhaustion associated with the care of children with medical technology. CMC require intense care demands throughout the day and night including dressing changes, equipment and supply cleaning and purchasing, medication administration, and troubleshooting. Some FCs report experiencing burnout as a result. FCs also emphasized the difficulties of attending hospital appointments, especially when they have several in one week or have to travel long distances to the hospital.

FCs also expressed psychological and emotional challenges associated with the care of a child with medical technology. Some report not getting adequate support from their partners or family members because they are fearful of taking on the responsibility, work full-time, or did not receive training. Some FCs expressed their frustration and desire to escape the responsibility of caregiving for a mental break. FCs also highlighted the financial burden associated with the care of a child with medical technology. One FC noted having to borrow money from friends and family as having their child at home on medical technology put them into a financial crisis.

## **Discussion**

This study enhanced the current understanding of FCs' needs and experiences of caring for technology-dependent CMC. Previous research has focused largely on FCs experiences and challenges associated with the care of children that are already using medical technology.<sup>6 19-21</sup> Our study is unique in that we outline the challenges faced by FCs from when they first learn about the need for medical technology in hospital to when they learn to care for their child's new device in transition to home and experience new daily life.

1  
2  
3 In response to the first disclosure of their child's need for medical technology, most FCs  
4 reported experiencing fear and distress as well as hesitation to proceed with the decision to  
5 initiate the technology. This is consistent with previous research highlighting the emotional  
6 distress and decisional conflict experienced by families involved in the decision-making process  
7 about initiating medical technology for their child.<sup>22 23</sup> When making the first disclosure of a  
8 child's need for medical technology, it is critical for clinicians to recognize the psychological  
9 bearing this has on FCs. Findings from studies that examine caregiver experience in this  
10 decision-making process can inform how first disclosures should be facilitated. Importantly,  
11 caregivers appreciate clinicians who provide communication that is compassionate, transparent  
12 and frequent.<sup>24</sup> FCs undergoing the decision for pediatric home ventilation have expressed the  
13 benefit of connecting with other FCs in similar situations.<sup>25</sup> Caregivers have also highlighted the  
14 value of including external sources of supports in these discussions outside the healthcare team  
15 including extended family members, religious leaders and primary care providers.<sup>22 26 27</sup>

16  
17  
18  
19  
20  
21  
22  
23  
24  
25  
26  
27  
28  
29  
30  
31  
32  
33 Overall, there is a pressing need to provide robust psychological and emotional support  
34 during the process of communicating a child's need for technology. Importantly, our study  
35 cohort highlighted that undergoing the training was an emotional and stressful experience itself.  
36 Thus, training for clinical educators to support learners in stressful contexts and access to  
37 psychosocial supports should be available to FCs as an integral part of their training as well. FCs  
38 also highlighted how important it is for them to have education that is a combination of didactic  
39 and hands-on, personalized, and appropriately paced. They shared the need to further extend  
40 classroom-based education to ensure practice at the bedside, access to support in first 24 hours at  
41 home, and ongoing virtual care to help with equipment troubleshooting and managing  
42 complications. Other specific recommendations made by FCs in our study included a more  
43  
44  
45  
46  
47  
48  
49  
50  
51  
52  
53  
54  
55  
56  
57  
58  
59  
60



1  
2  
3 robust education on types of available supplies, improved access to the education program (i.e.,  
4 partners and patients themselves when applicable) and implementing a check-in by a healthcare  
5 provider in the first-week post-discharge.  
6  
7  
8  
9

10 FCs communicated that virtual approaches to providing education before (to other family  
11 members not at the hospital) and after discharge was highly desired. Similarly, Ravid et al.  
12 implemented a pilot intervention involving a ‘multidisciplinary discharge videoconference’ for  
13 CMC.<sup>28</sup> The participating physicians and FCs found the intervention acceptable due to a variety  
14 of benefits including the development of a shared understanding of the patient’s care plan,  
15 remote physical assessment by the primary care provider, transparency, humanization of the care  
16 handoff, and increased primary care provider comfort with the care of CMC.<sup>24</sup> Our program’s  
17 early experience with delivery of virtual visits after discharge for FCs of technology-dependent  
18 CMC is similar, and those in this study who received this service in addition to their baseline  
19 education greatly appreciated the ease of access and ongoing support of their competencies.  
20 Thus, follow-up in the form of virtual care is now standard of care for children initiated on  
21 technology and followed in the training program in our hospital.  
22  
23  
24  
25  
26  
27  
28  
29  
30  
31  
32  
33  
34  
35  
36  
37

38 Our study highlighted the impact of the Connected Care Program on FCs’ knowledge of  
39 medical technology and overall readiness to transition home. Despite the support provided to  
40 FCs by the training program, it is clear from our findings that day-to-day life continues to be  
41 stressful for FCs given the intensive nature of managing medical technology at home. FCs in our  
42 study reported several psychological, emotional, and financial challenges while caring for their  
43 technology-dependent child. It is well documented in the literature that caring for technology-  
44 dependent children can lead to adverse physical and mental health impacts on caregivers.<sup>29-31</sup>  
45  
46  
47  
48  
49  
50  
51  
52  
53  
54 FCs of children who depend on medical technology are at risk of acute and chronic sleep  
55  
56  
57  
58  
59  
60

1  
2  
3 deprivation, psychological distress, and impaired daytime functioning that may threaten their  
4 capacity for sustained caregiving.<sup>6</sup> In fact, the prevalence of psychosocial stress in FCs of CMC,  
5 who are frequently dependent on medical technology, is amongst the highest of all studied  
6 pediatric populations.<sup>32</sup> This psychosocial stress was exacerbated during the COVID-19  
7 pandemic.<sup>33 34</sup> Taken together, our study highlights the distress experienced by FCs at the time of  
8 technology initiation as well as during the transition home and adaptation to new daily life. Thus,  
9 beginning at the initiation of technology and at follow-up visits, it is critical for healthcare  
10 providers to question families about their needs and risk factors for psychosocial stress. This is  
11 an important step in facilitating the provision of appropriate education and related interventions,  
12 specifically focused on providing psychosocial support and access to specialized hospital and  
13 community resources.  
14  
15  
16  
17  
18  
19  
20  
21  
22  
23  
24  
25  
26  
27

### 28 ***Study Limitations***

29  
30  
31 There were some notable limitations to the study. Firstly, it was conducted with a focus  
32 on an education and capacity building program (Connected Care Program) within a single  
33 setting, which could limit the transferability of the findings to other institutions. However, this  
34 study may provide insights into other hospitals providing care for technology-dependent CMC  
35 with similar programs. Secondly, this study was conducted during the pandemic and participants  
36 were interviewed via videoconferencing rather than in person which may have limited the  
37 rapport established by the interviewer during the interview. Lastly, the participants in this  
38 qualitative study do not necessarily represent the breadth of all family experiences and  
39 temporally the study was influenced by pandemic related restrictions in service levels and  
40 policies that may not apply in a different context. However, the purposeful sampling allowed us  
41 to capture perspectives of a variety of the demographic, geographic, and sociocultural groups.  
42  
43  
44  
45  
46  
47  
48  
49  
50  
51  
52  
53  
54  
55  
56  
57  
58  
59  
60

### ***Conclusion***

FCs provided unique insights into their experiences of going home with new medical technology. FCs reinforced and highlighted the need to implement a comprehensive education and transition program that provides longitudinal support for all aspects of care. This includes support during the disclosure of the need for medical technology, learning to manage the technology, coordinating transition home, and post-discharge follow-up. Future research should include the co-development and implementation of these identified opportunities for improvement to ensure a more integrated and holistic support program for FCs of CMC going home with newly initiated medical technology.

## References

1. Himmelstein BP, Hilden JM, Boldt AM, Weissman D. Pediatric palliative care. *N Engl J Med*. 2004;350(17):1752-1762.
2. Judson L. Global childhood chronic illness. *Nurs Adm Q*. 2004;28(1):60-66.
3. Berry JG, Hall M, Hall DE, et al. Inpatient growth and resource use in 28 children's hospitals: a longitudinal, multi-institutional study. *JAMA pediatrics*. 2013;167(2):170-177.
4. Dosa NP, Boeing NM, Ms N, Kanter RK. Excess risk of severe acute illness in children with chronic health conditions. *Pediatrics*. 2001;107(3):499-504.
5. Raina P, O'Donnell M, Rosenbaum P, et al. The health and well-being of caregivers of children with cerebral palsy. *Pediatrics*. 2005;115(6):e626-e636.
6. Keilty K, Cohen E, Ho M, Spalding K, Stremmer R. Sleep disturbance in family caregivers of children who depend on medical technology: A systematic review. *J Pediatr Rehabil Med*. 2015;8(2):113-130.
7. Simon TD, Berry J, Feudtner C, et al. Children with complex chronic conditions in inpatient hospital settings in the United States. *Pediatrics*. 2010;126(4):647-655.
8. Leyenaar JK, O'Brien ER, Leslie LK, Lindenauer PK, Mangione-Smith RM. Families' priorities regarding hospital-to-home transitions for children with medical complexity. *Pediatrics*. 2017;139(1)
9. Desai AD, Durkin LK, Jacob-Files EA, Mangione-Smith R. Caregiver perceptions of hospital to home transitions according to medical complexity: a qualitative study. *Acad Pediatr*. 2016;16(2):136-144.
10. Goldin AB, Heiss KF, Hall M, et al. Emergency department visits and readmissions among children after gastrostomy tube placement. *J Pediatr*. 2016;174:139-145. e2.
11. Nackers A, Ehlenbach M, Kelly MM, Werner N, Warner G, Coller RJ. Encounters from device complications among children with medical complexity. *Hosp Pediatr*. 2019;9(1):6-12.
12. Wong AL, Meehan E, Babl FE, Reid SM, Catto-Smith A, Williams K, et al. Paediatric emergency department presentations due to feeding tube complications in children with cerebral palsy. *J Paediatr Child Health*. 2019;55(10):1230-6.
13. Cardenas A, Esser K, Wright E, Netten K, Edwards A, Rose J, et al. Caring for the Caregiver (C4C): An Integrated Stepped Care Model for Caregivers of Children With Medical Complexity. *Acad Pediatr*. 2022.
14. Lawrence PR, Spratling R. A Theory for Understanding Parental Workload and Capacity to Care for Children With Medical Complexity. *Res Theory Nurs Pract*. 2022;36(1):34-46.
15. Coller RJ, Lerner CF, Chung PJ, et al. Caregiving and Confidence to Avoid Hospitalization for Children with Medical Complexity. *J Pediatr*. 2022;
16. Connected Care: SickKids; [Available from: <https://www.connectedcare.sickkids.ca/>]
17. Hsieh H-F, Shannon SE. Three approaches to qualitative content analysis. *Qual Health Res*. 2005;15(9):1277-1288.
18. Urquhart C. Grounded Theory for Qualitative Research: A Practical Guide. 55 City Road, London 2013. Available from: <https://methods.sagepub.com/book/grounded-theory-for-qualitative-research>.
19. Spratling R, Lee J. Caregivers experiences in symptom management for their children who require medical technology at home. *J Spec Pediatr Nurs*. 2020;25(1):e12275.

20. Matsuzawa A, Shiroki Y, Arai J, Hirasawa A. Care coordination for children with medical complexity in Japan: Caregivers' perspectives. *Child Care Health Dev.* 2020;46(4):436-44.
21. Dewan T, Cohen E. Children with medical complexity in Canada. *Paediatr Child Health.* 2013;18(10):518-22.
22. Boss RD, Henderson CM, Raisanen JC, et al. Family Experiences Deciding For and Against Pediatric Home Ventilation. *J Pediatr.* 2021;229:223-31.
23. October TW, Jones AH, Greenlick Michals H, et al. Parental Conflict, Regret, and Short-term Impact on Quality of Life in Tracheostomy Decision-Making. *Pediatr Crit Care Med.* 2020;21(2).
24. Henderson CM, S. Wilfond B, Boss RD. Bringing Social Context Into the Conversation About Pediatric Long-term Ventilation. *Hosp Pediatr.* 2018;8(2):102-8.
25. Chiang J, Karim A, Hoffman A, et al. Tough transitions: Family caregiver experiences with a pediatric long-term ventilation discharge pathway. *Pediatr Pulmonol.* 2021;56(10):3380-3388.
26. Nageswaran S, Banks Q, Golden SL, et al. The role of religion and spirituality in caregiver decision-making about tracheostomy for children with medical complexity. *J Health Care Chaplain.* 2022;28(1):95-107.
27. Cady RG, Belew JL. Parent Perspective on Care Coordination Services for Their Child with Medical Complexity. *Children (Basel).* 2017;4(6).
28. Ravid NL, Zamora K, Rehm R, et al. Implementation of a multidisciplinary discharge videoconference for children with medical complexity: a pilot study. *Pilot and Feasibility Stud.* 2020;6(1):27.
29. Kuster PA, Badr LK. Mental health of mothers caring for ventilator-assisted children at home. *Issues Ment Health Nurs.* 2006;27(8):817-35.
30. Toly VB, Musil CM, Carl JC. Families with children who are technology dependent: normalization and family functioning. *West J Nurs Res.* 2012;34(1):52-71.
31. Cousino MK, Hazen RA. Parenting stress among caregivers of children with chronic illness: a systematic review. *J Pediatr Psychol.* 2013;38(8):809-28.
32. Verma R, Mehdian Y, Sheth N, et al. Screening for caregiver psychosocial risk in children with medical complexity: a cross-sectional study. *BMJ Paediatr Open.* 2020;4(1):e000671.
33. Diskin C, Orkin J, Agarwal T, et al. The Secondary Consequences of the COVID-19 Pandemic in Hospital Pediatrics. *Hosp Pediatr.* 2021;11(2):208-12.
34. Diskin C, Buchanan F, Cohen E, et al. The impact of the COVID-19 pandemic on children with medical complexity. *BMC Pediatr.* 2022;22(1):496.

**Table 1. Demographic and clinical characteristics of family caregivers and their children (N=14)**

| <b>Characteristics of Family Caregivers</b>       | <b>N (%) or mean <math>\pm</math> SD</b> |
|---------------------------------------------------|------------------------------------------|
| <b>Caregivers</b>                                 |                                          |
| Female                                            | 11 (78.6)                                |
| Male                                              | 3 (21.4)                                 |
| Caregiver age (years)                             | 38.3 $\pm$ 6.5                           |
| <b>Highest educational Level</b>                  |                                          |
| Secondary Education                               | 4 (28.6)                                 |
| Postsecondary Education                           | 9 (64.3)                                 |
| Prefer not to answer                              | 1 (7.1)                                  |
| <b>Employment status at the time of the study</b> |                                          |
| Employed                                          | 7 (50.0)                                 |
| Unemployed                                        | 5 (35.7)                                 |
| Receiving disability or retirement pension        | 2 (14.3)                                 |
| Average distance to hospital 1 way (km)           | 71.8 $\pm$ 67.8                          |
| <b>Characteristics of Child Participants</b>      |                                          |
| <b>Children</b>                                   |                                          |
| Female                                            | 11 (78.6)                                |
| Male                                              | 3 (21.4)                                 |
| <b>Age (years)</b>                                |                                          |
| <6                                                | 8 (57.1)                                 |
| 6-12                                              | 2 (14.3)                                 |
| 13-18                                             | 4 (28.6)                                 |
| <b>Primary diagnosis</b>                          |                                          |
| Musculoskeletal disease                           | 4 (28.6)                                 |
| Central nervous system disease                    | 9 (64.3)                                 |
| Respiratory disease                               | 1 (7.1)                                  |
| <b>Medical technology initiated</b>               |                                          |
| Enterostomy tubes                                 | 8                                        |
| Vascular access device                            | 5                                        |
| Respiratory device                                | 4                                        |

\*The number of medical technologies initiated does not total N=14 as some participants were started on more than one technology

**Table 2. Themes and Sub-themes with Illustrative Quotes**

| Themes                                                                                                          | Sub-themes                                                                         |                                                                                                                                                                                                                                                                                                                                                                                                                                                                                                                                                                                                                                                                                                                                                                                                                                                                                                                                                                                                                                                                                                                                                                                                                                                                                                                                                                                                                                                                                                                                                                                                                                                                                                                                                                                                                                                                                                                    |
|-----------------------------------------------------------------------------------------------------------------|------------------------------------------------------------------------------------|--------------------------------------------------------------------------------------------------------------------------------------------------------------------------------------------------------------------------------------------------------------------------------------------------------------------------------------------------------------------------------------------------------------------------------------------------------------------------------------------------------------------------------------------------------------------------------------------------------------------------------------------------------------------------------------------------------------------------------------------------------------------------------------------------------------------------------------------------------------------------------------------------------------------------------------------------------------------------------------------------------------------------------------------------------------------------------------------------------------------------------------------------------------------------------------------------------------------------------------------------------------------------------------------------------------------------------------------------------------------------------------------------------------------------------------------------------------------------------------------------------------------------------------------------------------------------------------------------------------------------------------------------------------------------------------------------------------------------------------------------------------------------------------------------------------------------------------------------------------------------------------------------------------------|
| 1. Family caregivers' reaction and preparedness towards the first disclosure of the need for medical technology | 1.1 Family caregivers' initial reaction to first disclosure by the healthcare team | <p><i>“Oh, I cried. I cried and cried and cried because I do not like central venous lines. They freak me out. They're big and bulky, and it lies right into the child's heart.” (SK-25)</i></p> <p><i>“It was sort of very shocking. Just overall, it was very emotional, it was something difficult to see, even though we knew that he needed it.” (SK-55)</i></p> <p><i>“I was nervous, because I thought it was like a big deal. And also maybe even like something like electric, you know, connecting to his body. So I was a little bit nervous, scared.” (SK-51)</i></p> <p><i>“So they suggested putting in a permanent port. And I was very against it because a close family friend actually had a stem cell treatment, ended up getting an infection and passed away from it. So knowing the risk associated with it, I just wasn't willing to treat to deal with that kind of high level risk...It's not for the faint of heart. And it's not it's not without risk.” (SK-B41)</i></p> <p><i>“The GJ tube bothered me but not as much as the trach did 'cause it was more in your face...It was really hard like I had to literally overcome fears because I didn't want to go in near it 'cause in my words I was grossed out by it.” (SK-7)</i></p> <p><i>“Yeah, at first when they were teaching me how to do the flush, I was very scared. I was nervous. I was really nervous because I don't want to cause my son to have an infection.” (SK-25)</i></p> <p><i>“...but at first the purpose for it wasn't very well explained. And so at first it felt like we were jumping from she was just not eating and we just had to get her back to eating. But she had done just fine before this medication change to like suddenly needing a G-tube, but it felt it felt rushed...It felt like it was coming into left field, and so we were pretty like uncertain and even resistant to it</i></p> |

|                                                                                           |                                                                           |                                                                                                                                                                                                                                                                                                                                                                                                                                                                                                                                                                                                                                                                                                                                                                                                                                                                                                                                                                                                                                                                                                                                                                                                                                                                                                                                                                                                                                  |
|-------------------------------------------------------------------------------------------|---------------------------------------------------------------------------|----------------------------------------------------------------------------------------------------------------------------------------------------------------------------------------------------------------------------------------------------------------------------------------------------------------------------------------------------------------------------------------------------------------------------------------------------------------------------------------------------------------------------------------------------------------------------------------------------------------------------------------------------------------------------------------------------------------------------------------------------------------------------------------------------------------------------------------------------------------------------------------------------------------------------------------------------------------------------------------------------------------------------------------------------------------------------------------------------------------------------------------------------------------------------------------------------------------------------------------------------------------------------------------------------------------------------------------------------------------------------------------------------------------------------------|
|                                                                                           |                                                                           | <i>for the first few days before it got explained well, and then it was fine.” (SK-21)</i>                                                                                                                                                                                                                                                                                                                                                                                                                                                                                                                                                                                                                                                                                                                                                                                                                                                                                                                                                                                                                                                                                                                                                                                                                                                                                                                                       |
|                                                                                           | 1.2 Family caregivers' attitude towards participating in training program | <p><i>“At first, I didn't want to learn, but not everyone is entitled to nursing (at home), so the nurses told me you have to learn how to do it because they may not be around cause something could happen like X goes into distress or anything. So you have to learn. So I was like forced to learn. Even though I didn't want to, I had to.” (SK-7)</i></p> <p><i>“We're mere mortals, right? We're not medical professionals. To insert something into someone else's body like an NG Tube...the thought of it is a little scary and there's a lot more comfort knowing that medical professionals going to do it, someone who has inserted many in their lives. I don't want to be the one holding him down to do it. It's such an uncomfortable experience, right? What if I do it wrong? What if I stick it down as long? So many fears.” (SK-55)</i></p> <p><i>“So, I was doing a lot of trach changes at 3 1/2 years. But I really blocked this memory, and it was very hard for me to start changing the trach again. Every time...even the thought of it I would be having a panic attack. I was very, very nervous about the trach changes...So the part of taking care of the trach wasn't so bad. But actual trach changes were the worst to learn.” (SK-1)</i></p> <p><i>“There were certain points during the class where I would just break down and start crying because it's just so much.” (SK-25)</i></p> |
| 2. The value of education and transition support for initiation of new medical technology | 2.1 Experience of learning medical technology                             | <p><i>“I think the training was good in the sense that the information was readily available. The tools were there, the tools that were needed that X would be using were present. So I think for families, it's a comfort thing, right? Being discharged after a big procedure, stresses are high. I just believe that thorough training is important; that all the appropriate equipment was there which it was. The lady who did the training for us was fantastic. She was in no rush, we had as much time as we needed. I think the program in that sense was set up quite well for us.” (SK-29)</i></p> <p><i>“But I received all the training that I needed and then we were at the hospital a little bit</i></p>                                                                                                                                                                                                                                                                                                                                                                                                                                                                                                                                                                                                                                                                                                         |



|  |  |                                                                                                                                                                                                                                                                                                                                                                                                                                                                                                                                                                                                                                                                                                                                                                                                                                                                                                                                                                                                                                                                                                                                                                                                                                                                                                                                                                                                                                                                                                                                                                                                                                                                                                                                                                                                                                                                                                                                                                                                                                                                                                                            |
|--|--|----------------------------------------------------------------------------------------------------------------------------------------------------------------------------------------------------------------------------------------------------------------------------------------------------------------------------------------------------------------------------------------------------------------------------------------------------------------------------------------------------------------------------------------------------------------------------------------------------------------------------------------------------------------------------------------------------------------------------------------------------------------------------------------------------------------------------------------------------------------------------------------------------------------------------------------------------------------------------------------------------------------------------------------------------------------------------------------------------------------------------------------------------------------------------------------------------------------------------------------------------------------------------------------------------------------------------------------------------------------------------------------------------------------------------------------------------------------------------------------------------------------------------------------------------------------------------------------------------------------------------------------------------------------------------------------------------------------------------------------------------------------------------------------------------------------------------------------------------------------------------------------------------------------------------------------------------------------------------------------------------------------------------------------------------------------------------------------------------------------------------|
|  |  | <p>longer so every time RT came with the helping me out, telling me, and refreshing my memory. So I was very, very comfortable going home.” (SK-1)</p> <p>“...for me, it was really great. Because initially, it's a slide presentation about what the technology is, why he needs it, why other kids use it, quite a bit of background. And then they sort of go through it with the slides. What is happening when you're flushing, why you need to flush it, And then I need to try actually doing it on this doll.” (SK-55)</p> <p>“Well, everything about it is helpful in the sense of how to properly care for your kid, right? So the fact of just knowing what to look for, knowing how to properly use it, knowing how to properly clean it, and looking for the signs of infection are the main important things. So it was all well covered. She demonstrated everything quite well, and the brochure that she left with us was great.”(SK-29)</p> <p>“She knew we were a little bit slow and hesitant. I think I initially booked for an hour. We went well over that time, went over like two hours. She was kind and very accommodating.” (SK-B35)</p> <p>“So the classes were very helpful. Like absolutely awesome, I think those classes are amazing because even though I've done it in the past, I needed to refresh my memory. It was very helpful 'cause I got to do everything on a little doll. And then once I did everything I remembered, I know how to do that. So the part of taking care of the trach wasn't so bad.” (SK-1)</p> <p>“I think it would be nice to have like a visual or pamphlet, or something just in case something were to happen, I know we have the write-up of it but just, a quick reference or even something to be like, oh, you want to go back through the training and make sure we remember everything.” (SK-23)</p> <p>“Oh, it was a lot to be honest. At one point like, in one session, I feel like as a mom, you know, you're already in different environments. Right? So grabbing all that information in one session, to be honest, was a lot.”(SK-1)</p> |
|--|--|----------------------------------------------------------------------------------------------------------------------------------------------------------------------------------------------------------------------------------------------------------------------------------------------------------------------------------------------------------------------------------------------------------------------------------------------------------------------------------------------------------------------------------------------------------------------------------------------------------------------------------------------------------------------------------------------------------------------------------------------------------------------------------------------------------------------------------------------------------------------------------------------------------------------------------------------------------------------------------------------------------------------------------------------------------------------------------------------------------------------------------------------------------------------------------------------------------------------------------------------------------------------------------------------------------------------------------------------------------------------------------------------------------------------------------------------------------------------------------------------------------------------------------------------------------------------------------------------------------------------------------------------------------------------------------------------------------------------------------------------------------------------------------------------------------------------------------------------------------------------------------------------------------------------------------------------------------------------------------------------------------------------------------------------------------------------------------------------------------------------------|

|                                                                                      |                                                                                         |                                                                                                                                                                                                                                                                                                                                                                                                                                                                                                                                                                                                                                                                                                                                                                                                                                                                                                                                                                                                                                                                                                                                                                                                                                                                                                                                                                                                                                                                                                                                                                                                                                                    |
|--------------------------------------------------------------------------------------|-----------------------------------------------------------------------------------------|----------------------------------------------------------------------------------------------------------------------------------------------------------------------------------------------------------------------------------------------------------------------------------------------------------------------------------------------------------------------------------------------------------------------------------------------------------------------------------------------------------------------------------------------------------------------------------------------------------------------------------------------------------------------------------------------------------------------------------------------------------------------------------------------------------------------------------------------------------------------------------------------------------------------------------------------------------------------------------------------------------------------------------------------------------------------------------------------------------------------------------------------------------------------------------------------------------------------------------------------------------------------------------------------------------------------------------------------------------------------------------------------------------------------------------------------------------------------------------------------------------------------------------------------------------------------------------------------------------------------------------------------------|
|                                                                                      | <p>2.2 Access to education and transition support for medical technology management</p> | <p><i>“I think the pandemic has given us the opportunity to like Zoom, for instance...Just like, send an email, hey, I'm having a complication. Then, they're like, hey, I got a Zoom link let me have a peek. Do you know what I mean? Troubleshoot it with those families online and then they can be like, yeah, this is something that you should probably make your way down to X for.” (SK-29)</i></p> <p><i>“It seems like they train the parents, and unfortunately with COVID, I know there's, a limit. But, even like, if they could do like virtual classes for like, you know, like say for my sister or for X, so, they'd know a little bit more about it.” (SK-23)</i></p> <p><i>“The other thing that was done that I wish was that every month, every at least three months, someone can check up on you, you know what I mean? Hey, how are you doing? How's everything doing? Do you need any help? Like, how do you feel about it... just making sure the parent is not overwhelmed. You know, I mean, and also the parent is still on the same page with the training or updated and just keep on trial that the parent is doing well with a child. (SK-51)</i></p> <p><i>“Having somebody come in and actually take a look, make sure that you do it right, in the first weeks...Because you want to get a second opinion, from a professional. Me, being like the first time doing this. You always have this question in the back of your head, did I do anything right? And like I would then look over the checklist over the checklist once or twice or three times, making sure that you do it right.” (SK-B35)</i></p> |
| <p>3. The challenges associated with managing new medical technology in the home</p> | <p>3.1 The initial transition home</p>                                                  | <p><i>“Yeah, it's one it's definitely a totally different thing when you're in the hospital setting, But just coming home it was it was a nightmare.” (SK-B41)</i></p> <p><i>“...like he's just home from the hospital. I don't know, like, you don't even, like you go from having 24/7 care. Like anything happens like a nurse runs in, so when you're at home and it's like, okay, like I know, they gave me all the information of who to call and what to call like, you're like, ‘am I calling the right person, who am I like who supposed to reach out to?’” (SK-B41)</i></p>                                                                                                                                                                                                                                                                                                                                                                                                                                                                                                                                                                                                                                                                                                                                                                                                                                                                                                                                                                                                                                                             |

|  |                                                                     |                                                                                                                                                                                                                                                                                                                                                                                                                                                                                                                                                                                                                                                                                                                                                                                                                                                                                                                                                                                                                                                                                                                                                                                                                                                                                                                                                        |
|--|---------------------------------------------------------------------|--------------------------------------------------------------------------------------------------------------------------------------------------------------------------------------------------------------------------------------------------------------------------------------------------------------------------------------------------------------------------------------------------------------------------------------------------------------------------------------------------------------------------------------------------------------------------------------------------------------------------------------------------------------------------------------------------------------------------------------------------------------------------------------------------------------------------------------------------------------------------------------------------------------------------------------------------------------------------------------------------------------------------------------------------------------------------------------------------------------------------------------------------------------------------------------------------------------------------------------------------------------------------------------------------------------------------------------------------------|
|  |                                                                     | <p><i>“The other challenge at home was I have another 18 month old Another child that I was afraid would kinda grab at it. And so we had to make arrangements for that which she was always higher up that he couldn't reach her but sometimes we would hold her and then my other child could probably come in and pull the tube out...That fear was was there. Keep him away. So always under 24/7 kind of being aware of his presence near the baby. That was a challenge for us.” (SK-B35)</i></p> <p><i>“And we were told that the (homecare) nurse would come on the daily to do the hep-locking and to change his bandage on a weekly basis. We were told that that same day that we got home supplies would be delivered. Yeah, well fast forward to the day after we were home and I'm waiting for the hep-locks, no contact with anybody. We didn't get any materials and we didn't get any nursing care. So the entire time that he was home with the line, we didn't have a nurse come at all, because there was a nursing shortage.” (SK-B41)</i></p> <p><i>“So what was eight to 10 hours, like just looking during the day, just making sure it is not pulling anything that he's not touching and making sure he's not throwing up. Making sure that the tube is not out. I was going so crazy about it to be honest.” (SK-51)</i></p> |
|  | 3.2 Difficulties dealing with emergencies and medical complications | <p><i>“I think that probably the one thing that we felt unprepared for was how frequent infections could be. So I think that it would be helpful to have a little bit more information. Since the G-tube was inserted, [child] has had three site infections. For us, it feels like a massive failure in terms of managing even though we're doing everything we should be doing.” (SK-21)</i></p> <p><i>“Yeah, like I've never done a cap change before. Then, one day he needed it to be done, I couldn't flush his line and I couldn't get blood return because the cap was still f***** up. So I turned to my husband, I was like, I've got to do it. I've seen it done 1000 times. I can do it. I was just really nervous about it because what if I mess up.” (SK-25)</i></p>                                                                                                                                                                                                                                                                                                                                                                                                                                                                                                                                                                    |

|  |                                                                             |                                                                                                                                                                                                                                                                                                                                                                                                                                                                                                                                                                                                                                                                                                                                                                                                                                                                                                                                                                                                                                                                                                                                                                                                                                                                                                                                                                                                                                                                                                                                                                                          |
|--|-----------------------------------------------------------------------------|------------------------------------------------------------------------------------------------------------------------------------------------------------------------------------------------------------------------------------------------------------------------------------------------------------------------------------------------------------------------------------------------------------------------------------------------------------------------------------------------------------------------------------------------------------------------------------------------------------------------------------------------------------------------------------------------------------------------------------------------------------------------------------------------------------------------------------------------------------------------------------------------------------------------------------------------------------------------------------------------------------------------------------------------------------------------------------------------------------------------------------------------------------------------------------------------------------------------------------------------------------------------------------------------------------------------------------------------------------------------------------------------------------------------------------------------------------------------------------------------------------------------------------------------------------------------------------------|
|  |                                                                             | <p><i>“Whereas, I wish there was a direct line to someone on call...I know there's a lot of kids that have PICC lines at X, but someone part of the discharge team that we could call and say this is the scenario we're running into right now, can we troubleshoot this with you? Or should we come down? Just because we live at a great distance, a couple of hours away, right? So, for us to go down and go to the emergency room and have them check it, and then it'd be something so simple. That's four hours, and the gas involved in the time and dragging me out in the middle of the pandemic and stuff.” (SK-29)</i></p> <p><i>“Yeah, like I've never done a cap change before. Then, one day he needed it to be done, I couldn't flush his line and I couldn't get blood return because the cap was still f***** up. So I turned to my husband, I was like, I've got to do it. I've seen it done 1000 times. I can do it. I was just really nervous about it because what if I mess up.” (SK-25)</i></p> <p><i>“like nobody was answering that was on top of the stress like I couldn't get ahold of anyone. It's like press zero if you if it's urgent I kept pressing zero and I would get voicemail no matter what I did I would get voicemail.” (SK-B41)</i></p> <p><i>“I do wish, as I said before, if we had someone more direct to reach out to that was part of that team of people who did the training. That were part of the discharge, I think that would be more helpful for someone like me, I can troubleshoot and we can figure it out.” (SK-29)</i></p> |
|  | <p>3.3 Increased emotional and financial burden among family caregivers</p> | <p><i>“I get up at 6:00 o'clock. Then it's either me or the nurse that starts the feed, it depends. If the nurse is here, because we only have her for four nights, then she starts the meds and his feed. When she's not here, it's all up to me. And she will do the diaper change also. But I get up and I'll do the sponge bath for him before he goes to school. I do the trach care when she's not here because I'm usually sleeping. So I have to do the trach care so the dressing and change the inner cannula, and then I dressed him up. And I put him to the wheelchair, and then I have to prepare his feed for lunch for the school and make sure that he has all his emergency app</i></p>                                                                                                                                                                                                                                                                                                                                                                                                                                                                                                                                                                                                                                                                                                                                                                                                                                                                                |

Confidential: For Review Only

|  |  |                                                                                                                                                                                                                                                                                                                                                                                                                                                                                                                                                                                                                                                                                                                                                                                                                                                                                                                                                                                                                                                                                                                                                                                                                                                                                                                                                                                                                                                                                                                                                                                                                                                                                                                                                                                                                                                                                                                                                                                                                                                                                                                                                                                             |
|--|--|---------------------------------------------------------------------------------------------------------------------------------------------------------------------------------------------------------------------------------------------------------------------------------------------------------------------------------------------------------------------------------------------------------------------------------------------------------------------------------------------------------------------------------------------------------------------------------------------------------------------------------------------------------------------------------------------------------------------------------------------------------------------------------------------------------------------------------------------------------------------------------------------------------------------------------------------------------------------------------------------------------------------------------------------------------------------------------------------------------------------------------------------------------------------------------------------------------------------------------------------------------------------------------------------------------------------------------------------------------------------------------------------------------------------------------------------------------------------------------------------------------------------------------------------------------------------------------------------------------------------------------------------------------------------------------------------------------------------------------------------------------------------------------------------------------------------------------------------------------------------------------------------------------------------------------------------------------------------------------------------------------------------------------------------------------------------------------------------------------------------------------------------------------------------------------------------|
|  |  | <p>which is the trach and the G tube line with him. Make sure that his backpack is filled with catheters, suction catheter, and Younkers, syringes, dressings, and then he also needs his oxygen tank with him and oximeter, and of course his suction machine and a ventilator. Then we wait for the school nurse to show up and then she goes on the bus with him and she goes to school with SK1." (SK-1)</p> <p>"I think we're probably pretty burnt out. I think that would be fair to say that we're very burnt out. And also it's worth it. So you know SK-21 is so much healthier with her technology than without it that it's worth it to do it and we're burnt out." (SK-21)</p> <p>"My life changed a lot too. I was always a caregiver because X was always disabled but before he didn't require 24 hour watch. I could leave him with one of my son's or my daughter-in-law. I could be gone all day and she could be taking care of him like a regular child. With X having a tracheostomy, I can only leave him with a nurse or another person who's trained. (SK-1)</p> <p>"I always feel like I'm running around like a chicken with their head cut off. I'm running from one area to another area, maintain a household, cook, clean and watch him. So it's just like, my sanity is when I go to bed at night. That's my time. But during the day it's literally chaos. Like if he's throwing up, then I have to think "why are you throwing up, was it too much feed?". You know you're always questioning and second guessing yourself. It's a lot of work, it really is." (SK-7)</p> <p>"It's parents like me that are falling through the cracks, and it's just like, we're just waiting for mom to have a mental break for her to just lose her mind. It's gotten close. It's really close to the point where I just want to put my kid in his room with his toys, close the door, and just sit outside for 20 minutes." (SK-25)</p> <p>"Where do I start? We don't have enough funding. There's nothing for caregivers. For example, I'm a single parent. I can't work really. It's very difficult for me to find employment and there's no financial support</p> |
|--|--|---------------------------------------------------------------------------------------------------------------------------------------------------------------------------------------------------------------------------------------------------------------------------------------------------------------------------------------------------------------------------------------------------------------------------------------------------------------------------------------------------------------------------------------------------------------------------------------------------------------------------------------------------------------------------------------------------------------------------------------------------------------------------------------------------------------------------------------------------------------------------------------------------------------------------------------------------------------------------------------------------------------------------------------------------------------------------------------------------------------------------------------------------------------------------------------------------------------------------------------------------------------------------------------------------------------------------------------------------------------------------------------------------------------------------------------------------------------------------------------------------------------------------------------------------------------------------------------------------------------------------------------------------------------------------------------------------------------------------------------------------------------------------------------------------------------------------------------------------------------------------------------------------------------------------------------------------------------------------------------------------------------------------------------------------------------------------------------------------------------------------------------------------------------------------------------------|

1  
2  
3  
4  
5  
6  
7  
8  
9  
10  
11  
12  
13  
14  
15  
16  
17  
18  
19  
20  
21  
22  
23  
24  
25  
26  
27  
28  
29  
30  
31  
32  
33  
34  
35  
36  
37  
38  
39  
40  
41  
42  
43  
44  
45  
46  
47  
48  
49  
50  
51  
52  
53  
54  
55  
56  
57  
58  
59  
60

|  |  |                                                                                                                                                                                                                                                                                                                 |
|--|--|-----------------------------------------------------------------------------------------------------------------------------------------------------------------------------------------------------------------------------------------------------------------------------------------------------------------|
|  |  | <p><i>for caregivers. Zero. Then another thing, medical supplies are very expensive. I still cannot get the grants for medical supplies. It takes forever and we left the hospital in May. In order to get medical supplies, I have to borrow money from my family and max out my credit cards.” (SK-1)</i></p> |
|--|--|-----------------------------------------------------------------------------------------------------------------------------------------------------------------------------------------------------------------------------------------------------------------------------------------------------------------|

Confidential: For Review Only

### Contributors Statement Page

Dr Reshma Amin and Dr Julia Orkin conceptualized and designed the study, and critically reviewed and revised the manuscript for important intellectual content.

Stephanie Chu, Krista Keilty and Dr Eyal Orkin were involved in the study design and critically reviewed and revised the manuscript for important intellectual content.

Natalie Pitch, Sam Mekhuri, Munazzah Ambreen designed the data collection instruments, and collected data. Dr Reshma Amin provided oversight for all of the data collection.

Natalie Pitch and Anam Shahil analyzed the qualitative data independently and discussed it with Dr Reshma Amin to agree on the major themes and categories.

Anam Shahil and Natalie Pitch co-wrote the initial draft of the manuscript.

All authors approved the final manuscript as submitted and agree to be accountable for all aspects of the work.

## Description of the Connected Care Program

The Connected Care Program is located at Canada's largest pediatric hospital, The Hospital for Sick Children, and was developed to support transitions from hospital to home and improve pediatric homecare for CMC, their families and healthcare providers. After discharge from hospital, these CMC are cared for by FCs and some receive provincially or privately funded home care services. The program was iteratively developed with guidance from patients, FCs, providers, and policy makers with expertise in the care and transition of CMC to home and community care. To support FCs whose children are initiated on medical technology in hospital, the Connected Care Program provides FC and homecare provider education prior to discharge. The novel training program combines theoretical content with the application of knowledge and skills using simulation to support FCs as they prepare to transition home. It leverages a standardized evidence-based curriculum that is delivered by hospital-based pediatric nurses who have extensive experience with clinical teaching and management of medical technology.

The specific teaching received by FCs depends on the technology used by their children but can include nasogastric tube care, tube feeding, tracheostomy care, suctioning, central venous line care, among other types of care. FCs learn how to manage the technology, manage potential equipment failure or malfunctioning, and identify scenarios that require emergency care. It is delivered one-on-one in a safe 'home like' learning environment away from the child's bedside that limits interruptions and is personalized to meet the unique learning needs of families. In addition, services include scheduled nurse and/or respiratory therapist-led virtual visits after discharge with FCs. There is also 24/7 access to nurse-led consultations by text, talk or video for homecare nurses of CMC for questions about medical technology education and practice. This approach aims to promote access to innovative education supports in transition from hospital to



1  
2  
3  
4  
5  
6  
7  
8  
9  
10  
11  
12  
13  
14  
15  
16  
17  
18  
19  
20  
21  
22  
23  
24  
25  
26  
27  
28  
29  
30  
31  
32  
33  
34  
35  
36  
37  
38  
39  
40  
41  
42  
43  
44  
45  
46  
47  
48  
49  
50  
51  
52  
53  
54  
55  
56  
57  
58  
59  
60

home and build competence and confidence in FCs and homecare providers (i.e., nurses) to safely manage the child’s new medical technology at home.

Confidential: For Review Only

## Connected Care Study Guide – Family Caregiver Experience

### *Part 1: Pre-hospital preparedness*

1. Let's talk about when you were in the hospital – can you tell me about the technology that your child was started on?
2. Can you tell me about your experience learning to care for your child's new medical technology?
  - a. [Can prompt]: Can you elaborate on what you learned?
  - b. [Can prompt]: Did you receive teaching in the hospital, or at bedside, or in a classroom?
  - c. [Can prompt]: Was the teaching in one session or split across sessions?
  - d. [Can prompt]: What was most helpful about the training that you received?
  - e. IF VIRTUALLY:
    - i. [Can prompt]: What was it like to receive the training through zoom?
    - ii. [Can prompt]: Do you think it would have been different to have the training in person?
    - iii. [Can prompt]: Were you watching or were you able to practice with a mannequin?
  - f. [Can prompt]: Was there anyone else in your household that received the training?
3. Before you left the hospital, did you feel like you had enough training before you went home?
  - a. Did you feel like you had enough practice and had the tools to succeed?
  - b. Now that you've gone home, do you feel like there was anything missing from the training you received?
4. What didn't go well in preparing for your child's care at home?
  - a. Do you think there was anything else that could have made you more confident?

### *Part 2: Home readiness experience*

5. Let's talk about after you were discharged from the hospital - Can you tell me about an average day in your life caring for your child using a medical technology at home?
  - a. How does your new medical new technology fit into your day?
  - b. How do you stay organized with all that you have to handle?
  - c. How are you managing or coping?
6. Which aspects of your CCP training are you using on an average day?
  - a. Is there any extra training or preparation you could have had in the hospital that would make a day like this a bit easier?

### *Part 3: Access and supports*

7. Now let's talk about your supports at home – how is it going with your home care nurses?
  - a. Do you think they feel comfortable caring for your child?
  - b. Are you confident in their skills as they care for your child's technologies?
  - c. Have you had any issues with your homecare support, such as cancelled shifts or nurses falling asleep during their night shift?

- 1  
2  
3  
4  
5  
6  
7  
8  
9  
10  
11  
12  
13  
14  
15  
16  
17  
18  
19  
20  
21  
22  
23  
24  
25  
26  
27  
28  
29  
30  
31  
32  
33  
34  
35  
36  
37  
38  
39  
40  
41  
42  
43  
44  
45  
46  
47  
48  
49  
50  
51  
52  
53  
54  
55  
56  
57  
58  
59  
60
8. Connected Care offers home care nurses access to call them 24/7. Do you know if your home care team used this service?
    - a. Can you tell me about any of your nurse's experiences communicating post-discharge with the 24/7 hotline or by e-mail or over the phone? Are you aware of any?
    - b. Have you spoken with your homecare nurses about their experience? Were you aware of the program (prompt Connected Care live)?
  9. Let's talk about your life at home. Often children recently discharged from hospital with new medical technologies may experience trouble or complications with the technology. Can you tell me if you have experienced this and what happened?
    - a. [*Can prompt*] Did you need to go to the hospital?
    - b. [*Can prompt*] What was your experience finding education and resources? Did you feel that your needs were identified and met?
    - c. Which materials or resources were especially helpful for you?
    - d. Which of the connected care materials did you make use of? If any, do you have any feedback to share about these?
    - e. Is there anything that would have been helpful that you didn't have?
    - f. Do you feel prepared for handling emergencies?
  10. Apart from the complications we discussed, have you experienced any other 'bad days' with the technology? Perhaps where your child had a medical emergency or an equipment failure or just a day that went sideways.
    - a. Is there anything that would have helped you get through this day?
    - b. Help us understand how we can better support families who are caring for a child with a new medical technology at home?
  11. We are coming to the end of the interview, do you have any additional questions or thoughts?

## COREQ (CONsolidated criteria for REporting Qualitative research) Checklist

A checklist of items that should be included in reports of qualitative research. You must report the page number in your manuscript where you consider each of the items listed in this checklist. If you have not included this information, either revise your manuscript accordingly before submitting or note N/A.

| Topic                                          | Item No. | Guide Questions/Description                                                                                                                              | Reported on Page No. |
|------------------------------------------------|----------|----------------------------------------------------------------------------------------------------------------------------------------------------------|----------------------|
| <b>Domain 1: Research team and reflexivity</b> |          |                                                                                                                                                          |                      |
| <i>Personal characteristics</i>                |          |                                                                                                                                                          |                      |
| Interviewer/facilitator                        | 1        | Which author/s conducted the interview or focus group?                                                                                                   |                      |
| Credentials                                    | 2        | What were the researcher's credentials? E.g. PhD, MD                                                                                                     |                      |
| Occupation                                     | 3        | What was their occupation at the time of the study?                                                                                                      |                      |
| Gender                                         | 4        | Was the researcher male or female?                                                                                                                       |                      |
| Experience and training                        | 5        | What experience or training did the researcher have?                                                                                                     |                      |
| <i>Relationship with participants</i>          |          |                                                                                                                                                          |                      |
| Relationship established                       | 6        | Was a relationship established prior to study commencement?                                                                                              |                      |
| Participant knowledge of the interviewer       | 7        | What did the participants know about the researcher? e.g. personal goals, reasons for doing the research                                                 |                      |
| Interviewer characteristics                    | 8        | What characteristics were reported about the interviewer/facilitator? e.g. Bias, assumptions, reasons and interests in the research topic                |                      |
| <b>Domain 2: Study design</b>                  |          |                                                                                                                                                          |                      |
| <i>Theoretical framework</i>                   |          |                                                                                                                                                          |                      |
| Methodological orientation and Theory          | 9        | What methodological orientation was stated to underpin the study? e.g. grounded theory, discourse analysis, ethnography, phenomenology, content analysis |                      |
| <i>Participant selection</i>                   |          |                                                                                                                                                          |                      |
| Sampling                                       | 10       | How were participants selected? e.g. purposive, convenience, consecutive, snowball                                                                       |                      |
| Method of approach                             | 11       | How were participants approached? e.g. face-to-face, telephone, mail, email                                                                              |                      |
| Sample size                                    | 12       | How many participants were in the study?                                                                                                                 |                      |
| Non-participation                              | 13       | How many people refused to participate or dropped out? Reasons?                                                                                          |                      |
| <i>Setting</i>                                 |          |                                                                                                                                                          |                      |
| Setting of data collection                     | 14       | Where was the data collected? e.g. home, clinic, workplace                                                                                               |                      |
| Presence of non-participants                   | 15       | Was anyone else present besides the participants and researchers?                                                                                        |                      |
| Description of sample                          | 16       | What are the important characteristics of the sample? e.g. demographic data, date                                                                        |                      |
| <i>Data collection</i>                         |          |                                                                                                                                                          |                      |
| Interview guide                                | 17       | Were questions, prompts, guides provided by the authors? Was it pilot tested?                                                                            |                      |
| Repeat interviews                              | 18       | Were repeat interviews carried out? If yes, how many?                                                                                                    |                      |
| Audio/visual recording                         | 19       | Did the research use audio or visual recording to collect the data?                                                                                      |                      |
| Field notes                                    | 20       | Were field notes made during and/or after the interview or focus group?                                                                                  |                      |
| Duration                                       | 21       | What was the duration of the interviews or focus group?                                                                                                  |                      |
| Data saturation                                | 22       | Was data saturation discussed?                                                                                                                           |                      |
| Transcripts returned                           | 23       | Were transcripts returned to participants for comment and/or                                                                                             |                      |

| Topic                                  | Item No. | Guide Questions/Description                                                                                                        | Reported on Page No. |
|----------------------------------------|----------|------------------------------------------------------------------------------------------------------------------------------------|----------------------|
|                                        |          | correction?                                                                                                                        |                      |
| <b>Domain 3: analysis and findings</b> |          |                                                                                                                                    |                      |
| <i>Data analysis</i>                   |          |                                                                                                                                    |                      |
| Number of data coders                  | 24       | How many data coders coded the data?                                                                                               |                      |
| Description of the coding tree         | 25       | Did authors provide a description of the coding tree?                                                                              |                      |
| Derivation of themes                   | 26       | Were themes identified in advance or derived from the data?                                                                        |                      |
| Software                               | 27       | What software, if applicable, was used to manage the data?                                                                         |                      |
| Participant checking                   | 28       | Did participants provide feedback on the findings?                                                                                 |                      |
| <i>Reporting</i>                       |          |                                                                                                                                    |                      |
| Quotations presented                   | 29       | Were participant quotations presented to illustrate the themes/findings?<br>Was each quotation identified? e.g. participant number |                      |
| Data and findings consistent           | 30       | Was there consistency between the data presented and the findings?                                                                 |                      |
| Clarity of major themes                | 31       | Were major themes clearly presented in the findings?                                                                               |                      |
| Clarity of minor themes                | 32       | Is there a description of diverse cases or discussion of minor themes?                                                             |                      |

Developed from: Tong A, Sainsbury P, Craig J. Consolidated criteria for reporting qualitative research (COREQ): a 32-item checklist for interviews and focus groups. *International Journal for Quality in Health Care*. 2007. Volume 19, Number 6: pp. 349 – 357

**Once you have completed this checklist, please save a copy and upload it as part of your submission. DO NOT include this checklist as part of the main manuscript document. It must be uploaded as a separate file.**

# BMJ Paediatrics Open

## Caring for children with new medical technology at home: parental perspectives

|                               |                                                                                                                                                                                                                                                                                                                                                                                                                                                                                                                                                                                                                                                                                                                                           |
|-------------------------------|-------------------------------------------------------------------------------------------------------------------------------------------------------------------------------------------------------------------------------------------------------------------------------------------------------------------------------------------------------------------------------------------------------------------------------------------------------------------------------------------------------------------------------------------------------------------------------------------------------------------------------------------------------------------------------------------------------------------------------------------|
| Journal:                      | <i>BMJ Paediatrics Open</i>                                                                                                                                                                                                                                                                                                                                                                                                                                                                                                                                                                                                                                                                                                               |
| Manuscript ID                 | bmjpo-2023-002062.R1                                                                                                                                                                                                                                                                                                                                                                                                                                                                                                                                                                                                                                                                                                                      |
| Article Type:                 | Original research                                                                                                                                                                                                                                                                                                                                                                                                                                                                                                                                                                                                                                                                                                                         |
| Date Submitted by the Author: | 13-Jul-2023                                                                                                                                                                                                                                                                                                                                                                                                                                                                                                                                                                                                                                                                                                                               |
| Complete List of Authors:     | Pitch, Natalie; University of Toronto Temerty Faculty of Medicine, Medicine<br>Shahil, Anam; University of Toronto Institute of Health Policy Management and Evaluation<br>Mekhuri, Samantha; The Hospital for Sick Children, Respiratory Medicine<br>Ambreen, Munazzah; The Hospital for Sick Children<br>Chu, Stephanie; The Hospital for Sick Children; University of Toronto, Lawrence S. Bloomberg Faculty of Nursing<br>Keilty, Krista; Hospital for Sick Children, Paediatrics; University of Toronto Lawrence S Bloomberg Faculty of Nursing,<br>Cohen, Eyal; Hospital for Sick Children, Division of Pediatric Medicine<br>Orkin, Julia; The Hospital for Sick Children, Paediatrics<br>Amin, Reshma; Hospital for Sick Children |
| Keywords:                     | Qualitative research, Technology                                                                                                                                                                                                                                                                                                                                                                                                                                                                                                                                                                                                                                                                                                          |
|                               |                                                                                                                                                                                                                                                                                                                                                                                                                                                                                                                                                                                                                                                                                                                                           |

SCHOLARONE™  
Manuscripts



I, the Submitting Author has the right to grant and does grant on behalf of all authors of the Work (as defined in the below author licence), an exclusive licence and/or a non-exclusive licence for contributions from authors who are: i) UK Crown employees; ii) where BMJ has agreed a CC-BY licence shall apply, and/or iii) in accordance with the terms applicable for US Federal Government officers or employees acting as part of their official duties; on a worldwide, perpetual, irrevocable, royalty-free basis to BMJ Publishing Group Ltd ("BMJ") its licensees and where the relevant Journal is co-owned by BMJ to the co-owners of the Journal, to publish the Work in this journal and any other BMJ products and to exploit all rights, as set out in our [licence](#).

The Submitting Author accepts and understands that any supply made under these terms is made by BMJ to the Submitting Author unless you are acting as an employee on behalf of your employer or a postgraduate student of an affiliated institution which is paying any applicable article publishing charge ("APC") for Open Access articles. Where the Submitting Author wishes to make the Work available on an Open Access basis (and intends to pay the relevant APC), the terms of reuse of such Open Access shall be governed by a Creative Commons licence – details of these licences and which [Creative Commons](#) licence will apply to this Work are set out in our licence referred to above.

Other than as permitted in any relevant BMJ Author's Self Archiving Policies, I confirm this Work has not been accepted for publication elsewhere, is not being considered for publication elsewhere and does not duplicate material already published. I confirm all authors consent to publication of this Work and authorise the granting of this licence.

## Caring for children with new medical technology at home: parental perspectives

**Short title:** Caring for children with medical technology at home

Natalie Pitch\*<sup>1</sup>, BSc

Anam Shahil<sup>2,3\*</sup>, BSc, MSc

Samantha Mekhuri<sup>2</sup>, MHSc

Munazzah Ambreen<sup>2</sup>, MBBS, MSc

Stephanie Chu<sup>4,5</sup>, RN, BScN, MN

Krista Keilty<sup>4,5</sup>, PhD

Eyal Cohen<sup>1,3,6,7,8,9</sup>, MD, MSc, FRCPC

Julia Orkin<sup>1,3,6,7</sup>, MD, MSc, FRCPC

Reshma Amin<sup>1,2,6,7</sup>, MD, MSc, FRCPC

\*Authors contributed equally

### Author Affiliations:

<sup>1</sup> Department of Pediatrics, University of Toronto, Toronto Canada

<sup>2</sup> Division of Respiratory Medicine, Department of Pediatrics, The Hospital for Sick Children, Toronto, Canada

<sup>3</sup> Institute of Health Policy, Management, and Evaluation, University of Toronto, Toronto, Canada

<sup>4</sup> Connected Care, The Hospital for Sick Children, University of Toronto, Canada

<sup>5</sup> Lawrence S. Bloomberg Faculty of Nursing, University of Toronto, Toronto, Ontario

<sup>6</sup> Division of Pediatric Medicine, The Hospital for Sick Children, Toronto, Canada

<sup>7</sup> Child Health Evaluative Sciences, SickKids Research Institute, Toronto, Canada

<sup>8</sup> CanChild Centre for Childhood Disability Research, McMaster University, Hamilton, Ontario, Canada

<sup>9</sup> Edwin S.H. Leong Centre for Healthy Children, University of Toronto, Toronto, Ontario, Canada

**Address correspondence to:** Natalie Pitch, MD, Department of Pediatrics, University of Toronto, Toronto Canada, 555 University Ave, Toronto, Ontario. M5G 1X8. E-mail:

[natalie.pitch@mail.utoronto.ca](mailto:natalie.pitch@mail.utoronto.ca)

**Conflict of Interest Disclosures (includes financial disclosures):** No potential conflicts of interest to disclose.

**Funding/Support:** Funded by the Canadian Institute for Health Research grant number TEG 165590

**Role of Funder/Sponsor (if any):** N/A

**Ethical Approval:** SickKids Research Ethics Board number 1000064641



**ABSTRACT:**

**Objectives:** This qualitative descriptive study explores the experiences of family caregivers (FCs) of children with medical complexity (CMC) who are initiated on new medical technology in the hospital and transition to new daily life at home. The study aims to investigate FCs' response and readiness for medical technology use, the value of education and transition support, and the challenges associated with managing new medical technology in the home.

**Study design:** A qualitative descriptive approach was used to conduct and analyze 14 semi-structured interviews with a group of FCs composed of 11 mothers and 3 fathers. Content analysis was used to analyze transcripts of the caregiver interviews. The study was conducted at a tertiary pediatric hospital in Toronto, Canada.

**Results:** Our study revealed three main themes: FC's response and readiness for medical technology use, the value of education and transition support for initiation of new medical technology, and the challenges associated with managing new medical technology in the home. FCs expressed emotional distress related to coping with the realization that their child required medical technology. Although the theoretical and hands-on practice training instilled confidence in families, FCs reported feeling overwhelmed when they transitioned home with new medical technology. Finally, FCs reported significant psychological, emotional, and financial challenges while caring for their technology-dependent child.

**Conclusions:** Our study reveals the unique challenges faced by FCs who care for technology-dependent children. These findings highlight the need to implement a comprehensive education and transition program that provides longitudinal support for all aspects of care.

**What is already known on this topic:**

- Family caregivers of technology-dependent CMC experience several challenges in their transition home from hospital, especially related to medical technology complications

**What this study adds:**

- A training program that combines theoretical and hands-on learning can increase family caregivers' confidence in managing medical technology at home
- Family caregivers of children who are initiated on medical technology in hospital desire having more robust support following their discharge home as they adapt to new life

**How this study might affect research, practice or policy**

- There is a critical need to develop comprehensive education programs for family caregivers whose children are initiated on medical technology in hospital
- Educational and psychosocial supports should be available during the disclosure of the need for medical technology, training process, transition home, and post-discharge period

## Introduction

Children with medical complexity (CMC) are a growing population due to advancements in medical care and home technologies without which they would not have survived previously. (1-3) CMC are a group of diagnostically heterogeneous children whom are united by multiple chronic conditions, significant functional limitations, and dependence on technology. (4) CMC and their family caregivers (FCs) endure enormous challenges, including prolonged hospitalizations, poor care coordination, and caregiver burden. (4-6) Due to their underlying medical fragility, CMC often are frequent users of the healthcare system and experience significant morbidity and mortality. (3-7)

Families of CMC have reported that transitioning from hospital to home with technology-dependent children can be demanding because of the involvement of multiple healthcare providers and services. (8, 9) This transition experience is especially heightened by the addition of new medical technology such as tracheostomies, ventilators, and feeding tubes. A substantial amount of emergency department visits and hospital encounters in CMC are related to medical technology complications soon after technology initiation. (10-12) It has been postulated that several technology-related complications could be prevented or managed at home with appropriate support and action plans.

Previous research has shown that interventions aimed at enhancing the competency and confidence of FCs in managing new medical technology resulted in improved overall experiences of FCs and reduced psychological distress. (13, 14) For instance, a discharge coaching model for CMC decreased hospitalization and overall cost per patient, thereby

1  
2  
3 signalling that discharge interventions in this population have the potential for system-wide  
4  
5 improvement. (15)  
6

7  
8 To improve the quality of life of technology-dependent CMC and their FCs, there is a  
9  
10 critical need to gain a deeper understanding of whether innovation in education is meeting their  
11  
12 needs with medical technology. This study has been conducted as part of a larger prospective  
13  
14 observational study to evaluate the impact of a training program called Connected Care on acute  
15  
16 healthcare utilization and the experiences of technology-dependent CMC, their families, and  
17  
18 home healthcare providers. The aim of this qualitative study was to explore FCs' experiences  
19  
20 with caring for CMC who are initiated on medical technology during a hospital admission. We  
21  
22 sought to understand their experiences undergoing the training program in hospital as well as  
23  
24 throughout the process of being discharged and transitioning to new daily life at home.  
25  
26  
27

## 28 **METHODS**

### 29 **Study Design**

30  
31  
32 We conducted a qualitative descriptive study using semi-structured interviews with FCs.  
33  
34 Data were collected between December 2020 and May 2022. Institutional research board  
35  
36 approval was obtained [Research Ethics Board number 1000064641]. A subset of primary FCs  
37  
38 already enrolled in a prospective, observational study to evaluate the Connected Care Program  
39  
40 were invited to participate in this qualitative study via phone call. FCs were eligible for study  
41  
42 inclusion if they (1) had CMC who were newly initiated (in-hospital) on new medical technology  
43  
44 such as enterostomy tubes, respiratory technology, and vascular access (e.g., peripherally  
45  
46 inserted central catheter (PICC line), port-a-catheter); (2) could read, write, and understand  
47  
48 English, and (3) provide informed consent for study participation. The definition of CMC for  
49  
50 study inclusion is a child with complex chronic conditions and/or neurologic impairment  
51  
52  
53  
54  
55  
56  
57  
58  
59  
60

1  
2  
3 requiring specialized care, substantial healthcare needs, functional limitations, and high  
4  
5 healthcare resource utilization. (3) The maximum variation sampling technique was used to  
6  
7 ensure representation from FCs of CMC across a range of social strata with diverse child and  
8  
9 family characteristics. Written voluntary consent was provided before study enrollment.  
10  
11 Participants were informed that they have the right to withdraw from the study at any time  
12  
13 without penalty.  
14  
15

### 16 17 **Connected Care Program**

18  
19 The Connected Care Program is located at Canada's largest pediatric hospital, The  
20  
21 Hospital for Sick Children, and was developed to support transitions from hospital to home and  
22  
23 improve pediatric homecare for CMC, their families and healthcare providers. (16) Please refer  
24  
25 to Supplementary Material 1 for a full description of the Connected Care Program.  
26  
27

### 28 29 **Data Collection**

30  
31 Health records were retrospectively reviewed for study participants' children for the  
32  
33 following: child's age, gender, single primary medical diagnosis, and medical  
34  
35 technology/technologies initiated. A demographic questionnaire was administered to FCs to  
36  
37 collect their age, gender, level of education, employment status and average distance to hospital.  
38  
39 Qualitative data collection included individual semi-structured interviews that were scheduled 3-  
40  
41 6 following discharge from hospital with new technology. Interview guides were developed  
42  
43 iteratively by the research team after a review of relevant literature and consultation with content  
44  
45 experts (see Supplementary Material 2). The interview guide explored the experiences and  
46  
47 perspectives of FCs' regarding their: 1) responses to the first disclosure of medical technology,  
48  
49 2) experiences in managing the care for a child dependent on medical technology, 3) knowledge,  
50  
51 impacts, facilitators and barriers of education programming; and 4) access and usefulness of  
52  
53  
54  
55  
56  
57  
58  
59  
60

1  
2  
3 supports in managing care for their child with new medical technology beyond discharge/in  
4  
5  
6 homecare. Interviews were conducted by a female medical student with formal training in  
7  
8 qualitative research (NP). There was no relationship established prior to study commencement.  
9  
10 The interviews were conducted online via Zoom Video Communications teleconference platform  
11  
12 or by phone as per participant preference.  
13

### 14 **Patient and Public Involvement**

15  
16  
17 Patients were not involved in the design and/or conduct of this study.  
18

### 19 **Data Analysis**

20  
21 Interviews were recorded, transcribed verbatim, and de-identified by a professional  
22  
23 transcriptionist. Qualitative data analysis software (NVivo 12 Plus) was used for data and coding  
24  
25 management. Conventional content analysis was used to analyze the transcripts. (17) The  
26  
27 inductive, 4-step content-analysis process was conducted to identify, code, and categorize  
28  
29 predominant themes from the text. First, all the transcripts were read several times by three  
30  
31 independent reviewers (AS, NP, and RA) to identify initial patterns and recurring categories.  
32  
33 Second, two reviewers independently coded all the interview transcripts (AS, NP). This step  
34  
35 involved the creation of several codes and their application over the volume of interviews by two  
36  
37 independent reviewers. Third, similar codes were grouped into categories and sub-themes and  
38  
39 later categories and sub-themes were grouped under major themes. Finally, the main themes and  
40  
41 sub-themes were discussed among the reviewers (AS, NP, RA) until agreement on the themes  
42  
43 was achieved and reflected the entire dataset. Methodologic rigor was established through  
44  
45 prolonged engagement and peer debriefing, and according to The Consolidated Criteria for  
46  
47 Reporting Qualitative Research (Supplementary Material 3). After 14 interviews, recruitment  
48  
49 was closed because data saturation was reached, defined as the point when additional data did  
50  
51  
52  
53  
54  
55  
56  
57  
58  
59  
60

1  
2  
3 not lead to the emergence of new themes. (18) Transcripts were not returned to participants;  
4  
5 however, they were provided a description of the coding framework.  
6  
7  
8  
9

## 10 **RESULTS**

11  
12 A total of 34 eligible participants were approached by the study team, of which 14 FCs of  
13  
14 CMC agreed to participate. The 20 participants who declined participation in the study reported  
15  
16 that they did not have time for an interview (n=13), or they did not want to participate in  
17  
18 additional research-related activities (n=7). The demographic information for the FCs is shown  
19  
20 in Table 1. Of the 14 semi-structured interviews conducted, 3 were with fathers and 11 were with  
21  
22 mothers. Each of these interviews lasted between 30 and 60 minutes. The demographic and  
23  
24 clinical information for the children of participating FCs is also shown in Table 1.  
25  
26  
27  
28  
29  
30

### 31 **Framework for Experiences of Family Caregivers of Children with New Medical** 32 33 **Technology at Home**

34  
35 Based on the content analysis, three overarching themes emerged from the interviews: (1)  
36  
37 FCs' response and readiness for medical technology use; (2) the value of education and transition  
38  
39 support for initiation of new medical technology; (3) the challenges associated with managing  
40  
41 new medical technology in the home. The themes and sub-themes are outlined in summary Table  
42  
43  
44  
45 2. Please refer to Supplementary Material 4 for the full Table 2 with illustrative quotes.  
46

#### 47 ***1. Family Caregivers' Response and Readiness for Medical Technology Use***

##### 48 ***1.1 Family caregivers' initial reaction to first disclosure by the healthcare team***

49  
50  
51 Most FCs reported experiencing emotional distress in response to the first disclosure of  
52  
53 their child's need for medical technology. Some expressed feeling nervous and emotional while  
54  
55  
56  
57  
58  
59  
60

1  
2  
3 others felt shocked and scared by the idea of their child being dependent on medical technology.  
4  
5 Many felt hesitant about the decision to proceed with medical technology because of the fear  
6  
7 associated with caregiving responsibilities and risks. Even knowing they would receive  
8  
9 education, some FCs felt that they would not be capable of managing the technology. Some of  
10  
11 those who were initially hesitant about starting their child on technology noted feeling reassured  
12  
13 and more accepting of the technology following additional discussions with the healthcare team.  
14  
15  
16

### 17 1.2 Family caregivers' attitude towards participating in training program

18  
19 Nearly all FCs expressed feeling very anxious about the prospect of learning how to use  
20  
21 the technology. Some initially expressed not wanting to do the training altogether, believing that  
22  
23 they would not be capable of learning to manage at home. They expressed fear related to the  
24  
25 learning process and undertaking tasks normally done by healthcare professionals. One FC  
26  
27 whose child previously had a tracheostomy had panic attacks from the thought of having to  
28  
29 complete tracheostomy changes. Another FC noted feeling like she was not able to absorb the  
30  
31 information well during training because she was so overwhelmed by her child's admission.  
32  
33  
34

## 35 ***2. The value of education and transition support for initiation of new medical technology***

### 36 2.1 Experience of learning medical technology

37  
38  
39 FCs felt that the education they received played a significant role in improving their  
40  
41 knowledge of medical technology. They received both theoretical knowledge of the skills and  
42  
43 hands-on training using mannequins, both of which provided the opportunity to learn various  
44  
45 scenarios associated with technology as well as potential complications that could arise. Some  
46  
47 FCs appreciated that the educational material was provided in plain language without medical  
48  
49 jargon. FCs also noted that the nurse educators who were teaching provided them the flexibility  
50  
51 to learn at their own pace and the opportunity to ask as many questions as they needed. Many  
52  
53  
54  
55  
56  
57  
58  
59  
60



1  
2  
3 FCs appreciated the registered nurses and respiratory therapists for providing supplemental  
4 information and training support at the bedside.  
5  
6

7  
8 A few FCs provided suggestions to improve the overall learning experience including  
9 adjusting the speed of sessions according to participant level of understanding and learning pace  
10 as well as the development of additional training materials and recorded sessions in the take-  
11 home education package for quick reference. A few FCs reported that the educational material  
12 was too long with too much content to absorb in one session.  
13  
14  
15  
16  
17  
18  
19

## 20 2.2 Access to education and transition support for medical technology management

21  
22  
23 Most FCs reported adequate access to education and training support. Many received  
24 virtual follow-up visits from the program, which helped them in understanding the use of  
25 supplies in the home environment and responding to medical complications in real time.  
26  
27 However, some FCs felt the program was not accessible to their partners and extended family  
28 members due to restrictions imposed by the COVID-19 pandemic. One FC mentioned it was  
29 difficult to participate in training because additional caregivers were not allowed in hospital  
30 during the pandemic to care for her son, making it challenging to participate in the classes.  
31  
32 Another FC expressed wishing there was more flexible access to enable others at home also  
33 access to the program. FCs suggested expanded access with virtual sessions to be available to  
34 other groups of FCs such as partners, siblings, grandparents as well as patients (i.e., medically  
35 complex children) if they were willing to learn. To improve transition support, some FCs who  
36 did not receive them suggested the implementation of standardized longitudinal follow-up visits  
37 from members of the training program following discharge to ensure FCs are coping well.  
38  
39  
40  
41  
42  
43  
44  
45  
46  
47  
48  
49  
50  
51

## 52 ***3. The challenges associated with managing new medical technology in the home***

### 53 3.1 The initial transition home

1  
2  
3 FCs reported feeling stressed by the process of transitioning their child from hospital to  
4 home with new technology. They highlighted that returning home was a sudden change as they  
5 had been accustomed to a hospital environment where there is constant nursing care and support  
6 from the healthcare team. An added challenge at home was safety and FCs worried about  
7 ensuring that siblings did not disrupt or interfere with the medical technology. Further, a couple  
8 of FCs noted that they had difficulty ordering supplies or accessing different equipment at home  
9 compared to what they received training within hospital, making the transition more stressful.  
10 Some FCs felt they did not have adequate support at home on their first day of discharge.  
11  
12  
13  
14  
15  
16  
17  
18  
19  
20  
21

22 A few FCs mentioned strategies that they used to stay organized at home after discharge  
23 such as following a timetable, setting up stations for feeding, stocking up equipment, and  
24 dividing responsibilities among FCs at home. Even with these strategies, most FCs felt  
25 overwhelmed by the demands of managing the technology. For instance, one FC stated being  
26 overwhelmed because she had to spend an entire day observing her child to ensure that they did  
27 not pull out their tubes or throw up after feeding.  
28  
29  
30  
31  
32  
33  
34

### 35 3.2 Difficulties dealing with emergencies and medical complications

36

37 FCs also recounted their experiences of managing emergencies and medical  
38 complications at home. Common scenarios discussed included site infections, equipment  
39 malfunction, or difficulty with technology insertion/replacement. FCs reported feeling stressed  
40 and frustrated while trying to navigate these situations. A few FCs expressed not having  
41 adequate experience with tasks that are required to manage certain complications. Additionally,  
42 they expressed the need for more support in making the decision when to seek emergency care,  
43 especially given the distance that they live from the hospital. Many FCs mentioned that they do  
44 not have a clear point of contact for emergencies after discharge. They suggested that the  
45  
46  
47  
48  
49  
50  
51  
52  
53  
54  
55  
56  
57  
58  
59  
60

1  
2  
3 hospital should provide clear contact information and/or set up a virtual platform to connect  
4  
5 healthcare providers directly to FCs in such situations.  
6

### 7 3.3 Increased emotional and financial burden among family caregivers

8  
9  
10 FCs also highlighted the exhaustion associated with the care of children with medical  
11  
12 technology. CMC require intense care demands throughout the day and night including dressing  
13  
14 changes, equipment and supply cleaning and purchasing, medication administration, and  
15  
16 troubleshooting. Some FCs report experiencing burnout as a result. FCs also emphasized the  
17  
18 difficulties of attending hospital appointments, especially when they have several in one week or  
19  
20 have to travel long distances to the hospital.  
21  
22

23  
24 FCs also expressed psychological and emotional challenges associated with the care of a  
25  
26 child with medical technology. Some report not getting adequate support from their partners or  
27  
28 family members because they are fearful of taking on the responsibility, work full-time, or did  
29  
30 not receive training. Some FCs expressed their frustration and desire to escape the responsibility  
31  
32 of caregiving for a mental break. FCs also highlighted the financial burden associated with the  
33  
34 care of a child with medical technology. One FC noted having to borrow money from friends and  
35  
36 family as having their child at home on medical technology put them into a financial crisis.  
37  
38  
39  
40  
41

## 42 **Discussion**

43  
44  
45 This study enhanced the current understanding of FCs' needs and experiences of caring  
46  
47 for technology-dependent CMC. Previous research has focused largely on FCs experiences and  
48  
49 challenges associated with the care of children that are already using medical technology. (6, 19-  
50  
51 21) Our study is unique in that we outline the challenges faced by FCs from when they first learn  
52  
53  
54  
55  
56  
57  
58  
59  
60

1  
2  
3 about the need for medical technology in hospital to when they learn to care for their child's new  
4 device in transition to home and experience new daily life.  
5  
6

7  
8 In response to the first disclosure of their child's need for medical technology, most FCs  
9 reported experiencing fear and distress as well as hesitation to proceed with the decision to  
10 initiate the technology. This is consistent with previous research highlighting the emotional  
11 distress and decisional conflict experienced by families involved in the decision-making process  
12 about initiating medical technology for their child. (22, 23) When making the first disclosure of a  
13 child's need for medical technology, it is critical for clinicians to recognize the psychological  
14 bearing this has on FCs. Findings from studies that examine caregiver experience in this  
15 decision-making process can inform how first disclosures should be facilitated. Importantly,  
16 caregivers appreciate clinicians who provide communication that is compassionate, transparent  
17 and frequent. (24) FCs undergoing the decision for pediatric home ventilation have expressed the  
18 benefit of connecting with other FCs in similar situations. (25) Caregivers have also highlighted  
19 the value of including external sources of supports in these discussions outside the healthcare  
20 team including extended family members, religious leaders and primary care providers. (22, 26,  
21 27)  
22  
23  
24  
25  
26  
27  
28  
29  
30  
31  
32  
33  
34  
35  
36  
37  
38  
39

40 Overall, there is a pressing need to provide robust psychological and emotional support  
41 during the process of communicating a child's need for technology. Importantly, our study  
42 cohort highlighted that undergoing the training was an emotional and stressful experience itself.  
43 Thus, training for clinical educators to support learners in stressful contexts and access to  
44 psychosocial supports should be available to FCs as an integral part of their training as well. FCs  
45 also highlighted how important it is for them to have education that is a combination of didactic  
46 and hands-on, personalized, and appropriately paced. They shared the need to further extend  
47  
48  
49  
50  
51  
52  
53  
54  
55  
56  
57  
58  
59  
60

1  
2  
3 classroom-based education to ensure practice at the bedside, access to support in first 24 hours at  
4 home, and ongoing virtual care to help with equipment troubleshooting and managing  
5 complications. Other specific recommendations made by FCs in our study included a more  
6 robust education on types of available supplies, improved access to the education program (i.e.,  
7 partners and patients themselves when applicable) and implementing a check-in by a healthcare  
8 provider in the first-week post-discharge.  
9

10  
11  
12  
13  
14  
15  
16  
17 FCs communicated that virtual approaches to providing education before (to other family  
18 members not at the hospital) and after discharge was highly desired. Similarly, Ravid et al.  
19 implemented a pilot intervention involving a ‘multidisciplinary discharge videoconference’ for  
20 CMC. (28) The participating physicians and FCs found the intervention acceptable due to a  
21 variety of benefits including the development of a shared understanding of the patient’s care  
22 plan, remote physical assessment by the primary care provider, transparency, humanization of  
23 the care handoff, and increased primary care provider comfort with the care of CMC. (24) Our  
24 program’s early experience with delivery of virtual visits after discharge for FCs of technology-  
25 dependent CMC is similar, and those in this study who received this service in addition to their  
26 baseline education greatly appreciated the ease of access and ongoing support of their  
27 competencies. Thus, follow-up in the form of virtual care is now standard of care for children  
28 initiated on technology and followed in the training program in our hospital.  
29  
30  
31  
32  
33  
34  
35  
36  
37  
38  
39  
40  
41  
42  
43

44  
45 Our study highlighted the impact of the Connected Care Program on FCs’ knowledge of  
46 medical technology and overall readiness to transition home. Despite the support provided to  
47 FCs by the training program, it is clear from our findings that day-to-day life continues to be  
48 stressful for FCs given the intensive nature of managing medical technology at home. FCs in our  
49 study reported several psychological, emotional, and financial challenges while caring for their  
50  
51  
52  
53  
54  
55  
56  
57  
58  
59  
60

1  
2  
3 technology-dependent child. It is well documented in the literature that caring for technology-  
4  
5 dependent children can lead to adverse physical and mental health impacts on caregivers. (29-31)  
6  
7 FCs of children who depend on medical technology are at risk of acute and chronic sleep  
8  
9 deprivation, psychological distress, and impaired daytime functioning that may threaten their  
10  
11 capacity for sustained caregiving. (6) In fact, the prevalence of psychosocial stress in FCs of  
12  
13 CMC, who are frequently dependent on medical technology, is amongst the highest of all studied  
14  
15 pediatric populations. (32) This psychosocial stress was exacerbated during the COVID-19  
16  
17 pandemic. (33, 34) Taken together, our study highlights the distress experienced by FCs at the  
18  
19 time of technology initiation as well as during the transition home and adaptation to new daily  
20  
21 life. Thus, beginning at the initiation of technology and at follow-up visits, it is critical for  
22  
23 healthcare providers to question families about their needs and risk factors for psychosocial  
24  
25 stress. This is an important step in facilitating the provision of appropriate education and related  
26  
27 interventions, specifically focused on providing psychosocial support and access to specialized  
28  
29 hospital and community resources.  
30  
31  
32  
33  
34

### 35 ***Study Limitations***

36  
37  
38 There were some notable limitations to the study. The study included a sample size of 14  
39  
40 FCs (11 mothers and 3 fathers). While data saturation was reached, the small sample size limits  
41  
42 the generalizability of the findings. Thus, experiences and perspectives of these caregivers may  
43  
44 not be representative of all FCs of CMC. The participants were recruited from a larger  
45  
46 prospective observational study, and only those who agreed to participate were included in the  
47  
48 qualitative study. It is possible that those who chose to participate may have different  
49  
50 experiences or perspectives compared to those who declined, introducing selection bias. The  
51  
52 study was conducted at a tertiary pediatric hospital in Toronto, Canada. The sample may not be  
53  
54  
55  
56  
57  
58  
59  
60

1  
2  
3 representative of the broader population of FCs of CMC, particularly in terms of cultural and  
4 socioeconomic diversity. The findings may be influenced by cultural, socioeconomic, and  
5  
6 healthcare system factors unique to the study setting. Therefore, caution should be exercised  
7  
8 when applying the study findings to other populations or contexts.  
9

10  
11  
12 Further, the data collected in the study relied on self-reported experiences of the FCs.  
13  
14 There is a possibility of recall bias or social desirability bias, where participants may provide  
15 responses that they believe are expected or favorable. The study focused on the experiences of  
16 family caregivers from the time their child was initiated on medical technology in the hospital to  
17 the transition to home. Thus, the study does not provide insights into long-term experiences or  
18 the effectiveness of the Connected Care Program in the broader context of pediatric homecare.  
19  
20 The study did not include a comparison group of FCs who did not receive the Connected Care  
21 Program. Without a control group, it is difficult to determine the specific impact of the program  
22 on the caregivers' experiences and outcomes. The study was conducted during the pandemic and  
23 participants were interviewed via videoconferencing rather than in person which may have  
24 limited the rapport established by the interviewer during the interview. Lastly, the study  
25 primarily focused on the perspectives of FCs and did not include perspectives from other key  
26 stakeholders, such as healthcare professionals or home healthcare providers. Including multiple  
27 perspectives could have provided a more comprehensive understanding of the challenges and  
28 support needs during the transition from hospital to home with new medical technology.  
29  
30  
31  
32  
33  
34  
35  
36  
37  
38  
39  
40  
41  
42  
43  
44  
45

46  
47 Despite these limitations, the study provides valuable insights into the experiences and  
48 challenges faced by FCs of CMC and highlights the need for comprehensive education and  
49 support programs for these caregivers. The small sample size, limited generalizability, reliance  
50 on self-report data, and absence of perspectives from other stakeholders are important limitations  
51  
52  
53  
54  
55  
56  
57  
58  
59  
60

1  
2  
3 to consider when interpreting the findings. Further research with larger and more diverse samples  
4  
5 is needed to validate and expand upon these findings.  
6

### 7 ***Conclusion***

8  
9  
10 FCs provided unique insights into their experiences of going home with new medical  
11  
12 technology. FCs reinforced and highlighted the need to implement a comprehensive education  
13  
14 and transition program that provides longitudinal support for all aspects of care. This includes  
15  
16 support during the disclosure of the need for medical technology, learning to manage the  
17  
18 technology, coordinating transition home, and post-discharge follow-up. Future research should  
19  
20 include the co-development and implementation of these identified opportunities for  
21  
22 improvement to ensure a more integrated and holistic support program for FCs of CMC going  
23  
24 home with newly initiated medical technology.  
25  
26  
27  
28  
29  
30  
31  
32  
33  
34  
35  
36  
37  
38  
39  
40  
41  
42  
43  
44  
45  
46  
47  
48  
49  
50  
51  
52  
53  
54  
55  
56  
57  
58  
59  
60



## References

1. Himelstein BP, Hilden JM, Boldt AM, Weissman D. Pediatric palliative care. *N Engl J Med*. 2004;350(17):1752-1762.
2. Judson L. Global childhood chronic illness. *Nurs Adm Q*. 2004;28(1):60-66.
3. Berry JG, Hall M, Hall DE, et al. Inpatient growth and resource use in 28 children's hospitals: a longitudinal, multi-institutional study. *JAMA pediatrics*. 2013;167(2):170-177.
4. Dosa NP, Boeing NM, Ms N, Kanter RK. Excess risk of severe acute illness in children with chronic health conditions. *Pediatrics*. 2001;107(3):499-504.
5. Raina P, O'Donnell M, Rosenbaum P, et al. The health and well-being of caregivers of children with cerebral palsy. *Pediatrics*. 2005;115(6):e626-e636.
6. Keilty K, Cohen E, Ho M, Spalding K, Stremmer R. Sleep disturbance in family caregivers of children who depend on medical technology: A systematic review. *J Pediatr Rehabil Med*. 2015;8(2):113-130.
7. Simon TD, Berry J, Feudtner C, et al. Children with complex chronic conditions in inpatient hospital settings in the United States. *Pediatrics*. 2010;126(4):647-655.
8. Leyenaar JK, O'Brien ER, Leslie LK, Lindenauer PK, Mangione-Smith RM. Families' priorities regarding hospital-to-home transitions for children with medical complexity. *Pediatrics*. 2017;139(1)
9. Desai AD, Durkin LK, Jacob-Files EA, Mangione-Smith R. Caregiver perceptions of hospital to home transitions according to medical complexity: a qualitative study. *Acad Pediatr*. 2016;16(2):136-144.
10. Goldin AB, Heiss KF, Hall M, et al. Emergency department visits and readmissions among children after gastrostomy tube placement. *J Pediatr*. 2016;174:139-145. e2.
11. Nackers A, Ehlenbach M, Kelly MM, Werner N, Warner G, Coller RJ. Encounters from device complications among children with medical complexity. *Hosp Pediatr*. 2019;9(1):6-12.
- Wong AL, Meehan E, Babl FE, Reid SM, Catto-Smith A, Williams K, et al. Paediatric emergency department presentations due to feeding tube complications in children with cerebral palsy. *J Paediatr Child Health*. 2019;55(10):1230-6.
13. Cardenas A, Esser K, Wright E, Netten K, Edwards A, Rose J, et al. Caring for the Caregiver (C4C): An Integrated Stepped Care Model for Caregivers of Children With Medical Complexity. *Acad Pediatr*. 2022.
14. Lawrence PR, Spratling R. A Theory for Understanding Parental Workload and Capacity to Care for Children With Medical Complexity. *Res Theory Nurs Pract*. 2022;36(1):34-46.
15. Coller RJ, Lerner CF, Chung PJ, et al. Caregiving and Confidence to Avoid Hospitalization for Children with Medical Complexity. *J Pediatr*. 2022;
16. Connected Care: SickKids; [Available from: <https://www.connectedcare.sickkids.ca/>]
17. Hsieh H-F, Shannon SE. Three approaches to qualitative content analysis. *Qual Health Res*. 2005;15(9):1277-1288.
18. Urquhart C. Grounded Theory for Qualitative Research: A Practical Guide. 55 City Road, London 2013. Available from: <https://methods.sagepub.com/book/grounded-theory-for-qualitative-research>.

19. Spratling R, Lee J. Caregivers experiences in symptom management for their children who require medical technology at home. *J Spec Pediatr Nurs*. 2020;25(1):e12275.
20. Matsuzawa A, Shiroki Y, Arai J, Hirasawa A. Care coordination for children with medical complexity in Japan: Caregivers' perspectives. *Child Care Health Dev*. 2020;46(4):436-44.
21. Dewan T, Cohen E. Children with medical complexity in Canada. *Paediatr Child Health*. 2013;18(10):518-22.
22. Boss RD, Henderson CM, Raisanen JC, et al. Family Experiences Deciding For and Against Pediatric Home Ventilation. *J Pediatr*. 2021;229:223-31.
23. October TW, Jones AH, Greenlick Michals H, et al. Parental Conflict, Regret, and Short-term Impact on Quality of Life in Tracheostomy Decision-Making. *Pediatr Crit Care Med*. 2020;21(2).
24. Henderson CM, S. Wilfond B, Boss RD. Bringing Social Context Into the Conversation About Pediatric Long-term Ventilation. *Hosp Pediatr*. 2018;8(2):102-8.
25. Chiang J, Karim A, Hoffman A, et al. Tough transitions: Family caregiver experiences with a pediatric long-term ventilation discharge pathway. *Pediatr Pulmonol*. 2021;56(10):3380-3388.
26. Nageswaran S, Banks Q, Golden SL, et al. The role of religion and spirituality in caregiver decision-making about tracheostomy for children with medical complexity. *J Health Care Chaplain*. 2022;28(1):95-107.
27. Cady RG, Belew JL. Parent Perspective on Care Coordination Services for Their Child with Medical Complexity. *Children (Basel)*. 2017;4(6).
28. Ravid NL, Zamora K, Rehm R, et al. Implementation of a multidisciplinary discharge videoconference for children with medical complexity: a pilot study. *Pilot and Feasibility Stud*. 2020;6(1):27.
29. Kuster PA, Badr LK. Mental health of mothers caring for ventilator-assisted children at home. *Issues Ment Health Nurs*. 2006;27(8):817-35.
30. Toly VB, Musil CM, Carl JC. Families with children who are technology dependent: normalization and family functioning. *West J Nurs Res*. 2012;34(1):52-71.
31. Cousino MK, Hazen RA. Parenting stress among caregivers of children with chronic illness: a systematic review. *J Pediatr Psychol*. 2013;38(8):809-28.
32. Verma R, Mehdian Y, Sheth N, et al. Screening for caregiver psychosocial risk in children with medical complexity: a cross-sectional study. *BMJ Paediatr Open*. 2020;4(1):e000671.
33. Diskin C, Orkin J, Agarwal T, et al. The Secondary Consequences of the COVID-19 Pandemic in Hospital Pediatrics. *Hosp Pediatr*. 2021;11(2):208-12.
34. Diskin C, Buchanan F, Cohen E, et al. The impact of the COVID-19 pandemic on children with medical complexity. *BMC Pediatr*. 2022;22(1):496.

**Table 1. Demographic and clinical characteristics of family caregivers and their children (N=14)**

| <b>Characteristics of Family Caregivers</b>  | <b>N (%) or mean <math>\pm</math> SD</b> |
|----------------------------------------------|------------------------------------------|
| Caregivers                                   |                                          |
| Female                                       | 11 (78.6)                                |
| Male                                         | 3 (21.4)                                 |
| Caregiver age (years)                        | 38.3 $\pm$ 6.5                           |
| Highest educational Level                    |                                          |
| Secondary Education                          | 4 (28.6)                                 |
| Postsecondary Education                      | 9 (64.3)                                 |
| Prefer not to answer                         | 1 (7.1)                                  |
| Employment status at the time of the study   |                                          |
| Employed                                     | 7 (50.0)                                 |
| Unemployed                                   | 5 (35.7)                                 |
| Receiving disability or retirement pension   | 2 (14.3)                                 |
| Average distance to hospital 1 way (km)      | 71.8 $\pm$ 67.8                          |
| <b>Characteristics of Child Participants</b> |                                          |
| Children                                     |                                          |
| Female                                       | 11 (78.6)                                |
| Male                                         | 3 (21.4)                                 |
| Age (years)                                  |                                          |
| <6                                           | 8 (57.1)                                 |
| 6-12                                         | 2 (14.3)                                 |
| 13-18                                        | 4 (28.6)                                 |
| Primary diagnosis                            |                                          |
| Musculoskeletal disease                      | 4 (28.6)                                 |
| Central nervous system disease               | 9 (64.3)                                 |
| Respiratory disease                          | 1 (7.1)                                  |
| Medical technology initiated                 |                                          |
| Enterostomy tubes                            | 8                                        |
| Vascular access device                       | 5                                        |
| Respiratory device                           | 4                                        |

\*The number of medical technologies initiated does not total N=14 as some participants were started on more than one technology

**Table 2. Themes and Sub-themes**

| Themes                                                                                                          | Sub-themes                                                                                                                                                                     |
|-----------------------------------------------------------------------------------------------------------------|--------------------------------------------------------------------------------------------------------------------------------------------------------------------------------|
| 1. Family caregivers' reaction and preparedness towards the first disclosure of the need for medical technology | 1.1 Family caregivers' initial reaction to first disclosure by the healthcare team<br>1.2 Family caregivers' attitude towards participating in training program                |
| 2. The value of education and transition support for initiation of new medical technology                       | 2.1 Experience of learning medical technology<br>2.2 Access to education and transition support for medical technology management                                              |
| 3. The challenges associated with managing new medical technology in the home                                   | 3.1 The initial transition home<br>3.2 Difficulties dealing with emergencies and medical complications<br>3.3 Increased emotional and financial burden among family caregivers |

### Contributors Statement Page

Dr Reshma Amin and Dr Julia Orkin conceptualized and designed the study, and critically reviewed and revised the manuscript for important intellectual content.

Stephanie Chu, Krista Keilty and Dr Eyal Orkin were involved in the study design and critically reviewed and revised the manuscript for important intellectual content.

Natalie Pitch, Sam Mekhuri, Munazzah Ambreen designed the data collection instruments, and collected data. Dr Reshma Amin provided oversight for all of the data collection.

Natalie Pitch and Anam Shahil analyzed the qualitative data independently and discussed it with Dr Reshma Amin to agree on the major themes and categories.

Anam Shahil and Natalie Pitch co-wrote the initial draft of the manuscript.

All authors approved the final manuscript as submitted and agree to be accountable for all aspects of the work.

## Description of the Connected Care Program

The Connected Care Program is located at Canada's largest pediatric hospital, The Hospital for Sick Children, and was developed to support transitions from hospital to home and improve pediatric homecare for CMC, their families and healthcare providers. After discharge from hospital, these CMC are cared for by FCs and some receive provincially or privately funded home care services. The program was iteratively developed with guidance from patients, FCs, providers, and policy makers with expertise in the care and transition of CMC to home and community care. To support FCs whose children are initiated on medical technology in hospital, the Connected Care Program provides FC and homecare provider education prior to discharge. The novel training program combines theoretical content with the application of knowledge and skills using simulation to support FCs as they prepare to transition home. It leverages a standardized evidence-based curriculum that is delivered by hospital-based pediatric nurses who have extensive experience with clinical teaching and management of medical technology.

The specific teaching received by FCs depends on the technology used by their children but can include nasogastric tube care, tube feeding, tracheostomy care, suctioning, central venous line care, among other types of care. FCs learn how to manage the technology, manage potential equipment failure or malfunctioning, and identify scenarios that require emergency care. It is delivered one-on-one in a safe 'home like' learning environment away from the child's bedside that limits interruptions and is personalized to meet the unique learning needs of families. In addition, services include scheduled nurse and/or respiratory therapist-led virtual visits after discharge with FCs. There is also 24/7 access to nurse-led consultations by text, talk or video for homecare nurses of CMC for questions about medical technology education and practice. This approach aims to promote access to innovative education supports in transition from hospital to

1  
2  
3  
4  
5  
6  
7  
8  
9  
10  
11  
12  
13  
14  
15  
16  
17  
18  
19  
20  
21  
22  
23  
24  
25  
26  
27  
28  
29  
30  
31  
32  
33  
34  
35  
36  
37  
38  
39  
40  
41  
42  
43  
44  
45  
46  
47  
48  
49  
50  
51  
52  
53  
54  
55  
56  
57  
58  
59  
60

home and build competence and confidence in FCs and homecare providers (i.e., nurses) to safely manage the child’s new medical technology at home.

Confidential: For Review Only

## Connected Care Study Guide – Family Caregiver Experience

### *Part 1: Pre-hospital preparedness*

1. Let's talk about when you were in the hospital – can you tell me about the technology that your child was started on?
2. Can you tell me about your experience learning to care for your child's new medical technology?
  - a. [Can prompt]: Can you elaborate on what you learned?
  - b. [Can prompt]: Did you receive teaching in the hospital, or at bedside, or in a classroom?
  - c. [Can prompt]: Was the teaching in one session or split across sessions?
  - d. [Can prompt]: What was most helpful about the training that you received?
  - e. IF VIRTUALLY:
    - i. [Can prompt]: What was it like to receive the training through zoom?
    - ii. [Can prompt]: Do you think it would have been different to have the training in person?
    - iii. [Can prompt]: Were you watching or were you able to practice with a mannequin?
  - f. [Can prompt]: Was there anyone else in your household that received the training?
3. Before you left the hospital, did you feel like you had enough training before you went home?
  - a. Did you feel like you had enough practice and had the tools to succeed?
  - b. Now that you've gone home, do you feel like there was anything missing from the training you received?
4. What didn't go well in preparing for your child's care at home?
  - a. Do you think there was anything else that could have made you more confident?

### *Part 2: Home readiness experience*

5. Let's talk about after you were discharged from the hospital - Can you tell me about an average day in your life caring for your child using a medical technology at home?
  - a. How does your new medical new technology fit into your day?
  - b. How do you stay organized with all that you have to handle?
  - c. How are you managing or coping?
6. Which aspects of your CCP training are you using on an average day?
  - a. Is there any extra training or preparation you could have had in the hospital that would make a day like this a bit easier?

### *Part 3: Access and supports*

7. Now let's talk about your supports at home – how is it going with your home care nurses?
  - a. Do you think they feel comfortable caring for your child?
  - b. Are you confident in their skills as they care for your child's technologies?
  - c. Have you had any issues with your homecare support, such as cancelled shifts or nurses falling asleep during their night shift?



- 1  
2  
3  
4  
5  
6  
7  
8  
9  
10  
11  
12  
13  
14  
15  
16  
17  
18  
19  
20  
21  
22  
23  
24  
25  
26  
27  
28  
29  
30  
31  
32  
33  
34  
35  
36  
37  
38  
39  
40  
41  
42  
43  
44  
45  
46  
47  
48  
49  
50  
51  
52  
53  
54  
55  
56  
57  
58  
59  
60
8. Connected Care offers home care nurses access to call them 24/7. Do you know if your home care team used this service?
    - a. Can you tell me about any of your nurse's experiences communicating post-discharge with the 24/7 hotline or by e-mail or over the phone? Are you aware of any?
    - b. Have you spoken with your homecare nurses about their experience? Were you aware of the program (prompt Connected Care live)?
  9. Let's talk about your life at home. Often children recently discharged from hospital with new medical technologies may experience trouble or complications with the technology. Can you tell me if you have experienced this and what happened?
    - a. [*Can prompt*] Did you need to go to the hospital?
    - b. [*Can prompt*] What was your experience finding education and resources? Did you feel that your needs were identified and met?
    - c. Which materials or resources were especially helpful for you?
    - d. Which of the connected care materials did you make use of? If any, do you have any feedback to share about these?
    - e. Is there anything that would have been helpful that you didn't have?
    - f. Do you feel prepared for handling emergencies?
  10. Apart from the complications we discussed, have you experienced any other 'bad days' with the technology? Perhaps where your child had a medical emergency or an equipment failure or just a day that went sideways.
    - a. Is there anything that would have helped you get through this day?
    - b. Help us understand how we can better support families who are caring for a child with a new medical technology at home?
  11. We are coming to the end of the interview, do you have any additional questions or thoughts?

## COREQ (CONsolidated criteria for REporting Qualitative research) Checklist

A checklist of items that should be included in reports of qualitative research. You must report the page number in your manuscript where you consider each of the items listed in this checklist. If you have not included this information, either revise your manuscript accordingly before submitting or note N/A.

| Topic                                          | Item No. | Guide Questions/Description                                                                                                                              | Reported on Page No. |
|------------------------------------------------|----------|----------------------------------------------------------------------------------------------------------------------------------------------------------|----------------------|
| <b>Domain 1: Research team and reflexivity</b> |          |                                                                                                                                                          |                      |
| <i>Personal characteristics</i>                |          |                                                                                                                                                          |                      |
| Interviewer/facilitator                        | 1        | Which author/s conducted the interview or focus group?                                                                                                   |                      |
| Credentials                                    | 2        | What were the researcher's credentials? E.g. PhD, MD                                                                                                     |                      |
| Occupation                                     | 3        | What was their occupation at the time of the study?                                                                                                      |                      |
| Gender                                         | 4        | Was the researcher male or female?                                                                                                                       |                      |
| Experience and training                        | 5        | What experience or training did the researcher have?                                                                                                     |                      |
| <i>Relationship with participants</i>          |          |                                                                                                                                                          |                      |
| Relationship established                       | 6        | Was a relationship established prior to study commencement?                                                                                              |                      |
| Participant knowledge of the interviewer       | 7        | What did the participants know about the researcher? e.g. personal goals, reasons for doing the research                                                 |                      |
| Interviewer characteristics                    | 8        | What characteristics were reported about the interviewer/facilitator? e.g. Bias, assumptions, reasons and interests in the research topic                |                      |
| <b>Domain 2: Study design</b>                  |          |                                                                                                                                                          |                      |
| <i>Theoretical framework</i>                   |          |                                                                                                                                                          |                      |
| Methodological orientation and Theory          | 9        | What methodological orientation was stated to underpin the study? e.g. grounded theory, discourse analysis, ethnography, phenomenology, content analysis |                      |
| <i>Participant selection</i>                   |          |                                                                                                                                                          |                      |
| Sampling                                       | 10       | How were participants selected? e.g. purposive, convenience, consecutive, snowball                                                                       |                      |
| Method of approach                             | 11       | How were participants approached? e.g. face-to-face, telephone, mail, email                                                                              |                      |
| Sample size                                    | 12       | How many participants were in the study?                                                                                                                 |                      |
| Non-participation                              | 13       | How many people refused to participate or dropped out? Reasons?                                                                                          |                      |
| <i>Setting</i>                                 |          |                                                                                                                                                          |                      |
| Setting of data collection                     | 14       | Where was the data collected? e.g. home, clinic, workplace                                                                                               |                      |
| Presence of non-participants                   | 15       | Was anyone else present besides the participants and researchers?                                                                                        |                      |
| Description of sample                          | 16       | What are the important characteristics of the sample? e.g. demographic data, date                                                                        |                      |
| <i>Data collection</i>                         |          |                                                                                                                                                          |                      |
| Interview guide                                | 17       | Were questions, prompts, guides provided by the authors? Was it pilot tested?                                                                            |                      |
| Repeat interviews                              | 18       | Were repeat interviews carried out? If yes, how many?                                                                                                    |                      |
| Audio/visual recording                         | 19       | Did the research use audio or visual recording to collect the data?                                                                                      |                      |
| Field notes                                    | 20       | Were field notes made during and/or after the interview or focus group?                                                                                  |                      |
| Duration                                       | 21       | What was the duration of the interviews or focus group?                                                                                                  |                      |
| Data saturation                                | 22       | Was data saturation discussed?                                                                                                                           |                      |
| Transcripts returned                           | 23       | Were transcripts returned to participants for comment and/or                                                                                             |                      |

| Topic                                  | Item No. | Guide Questions/Description                                                                                                        | Reported on Page No. |
|----------------------------------------|----------|------------------------------------------------------------------------------------------------------------------------------------|----------------------|
|                                        |          | correction?                                                                                                                        |                      |
| <b>Domain 3: analysis and findings</b> |          |                                                                                                                                    |                      |
| <i>Data analysis</i>                   |          |                                                                                                                                    |                      |
| Number of data coders                  | 24       | How many data coders coded the data?                                                                                               |                      |
| Description of the coding tree         | 25       | Did authors provide a description of the coding tree?                                                                              |                      |
| Derivation of themes                   | 26       | Were themes identified in advance or derived from the data?                                                                        |                      |
| Software                               | 27       | What software, if applicable, was used to manage the data?                                                                         |                      |
| Participant checking                   | 28       | Did participants provide feedback on the findings?                                                                                 |                      |
| <i>Reporting</i>                       |          |                                                                                                                                    |                      |
| Quotations presented                   | 29       | Were participant quotations presented to illustrate the themes/findings?<br>Was each quotation identified? e.g. participant number |                      |
| Data and findings consistent           | 30       | Was there consistency between the data presented and the findings?                                                                 |                      |
| Clarity of major themes                | 31       | Were major themes clearly presented in the findings?                                                                               |                      |
| Clarity of minor themes                | 32       | Is there a description of diverse cases or discussion of minor themes?                                                             |                      |

Developed from: Tong A, Sainsbury P, Craig J. Consolidated criteria for reporting qualitative research (COREQ): a 32-item checklist for interviews and focus groups. *International Journal for Quality in Health Care*. 2007. Volume 19, Number 6: pp. 349 – 357

**Once you have completed this checklist, please save a copy and upload it as part of your submission. DO NOT include this checklist as part of the main manuscript document. It must be uploaded as a separate file.**

Table 2. Themes and Sub-themes with Illustrative Quotes

| Themes                                                                                                          | Sub-themes                                                                         |                                                                                                                                                                                                                                                                                                                                                                                                                                                                                                                                                                                                                                                                                                                                                                                                                                                                                                                                                                                                                                                                                                                                                                                                                                                                                                                                                                                                                                                                                                                                                                                                                                                                                                                                                                                                                                                                                                                                                                                                        |
|-----------------------------------------------------------------------------------------------------------------|------------------------------------------------------------------------------------|--------------------------------------------------------------------------------------------------------------------------------------------------------------------------------------------------------------------------------------------------------------------------------------------------------------------------------------------------------------------------------------------------------------------------------------------------------------------------------------------------------------------------------------------------------------------------------------------------------------------------------------------------------------------------------------------------------------------------------------------------------------------------------------------------------------------------------------------------------------------------------------------------------------------------------------------------------------------------------------------------------------------------------------------------------------------------------------------------------------------------------------------------------------------------------------------------------------------------------------------------------------------------------------------------------------------------------------------------------------------------------------------------------------------------------------------------------------------------------------------------------------------------------------------------------------------------------------------------------------------------------------------------------------------------------------------------------------------------------------------------------------------------------------------------------------------------------------------------------------------------------------------------------------------------------------------------------------------------------------------------------|
| 1. Family caregivers' reaction and preparedness towards the first disclosure of the need for medical technology | 1.1 Family caregivers' initial reaction to first disclosure by the healthcare team | <p><i>“Oh, I cried. I cried and cried and cried because I do not like central venous lines. They freak me out. They're big and bulky, and it lies right into the child's heart.” (SK-25)</i></p> <p><i>“It was sort of very shocking. Just overall, it was very emotional, it was something difficult to see, even though we knew that he needed it.” (SK-55)</i></p> <p><i>“I was nervous, because I thought it was like a big deal. And also maybe even like something like electric, you know, connecting to his body. So I was a little bit nervous, scared.” (SK-51)</i></p> <p><i>“So they suggested putting in a permanent port. And I was very against it because a close family friend actually had a stem cell treatment, ended up getting an infection and passed away from it. So knowing the risk associated with it, I just wasn't willing to treat to deal with that kind of high level risk...It's not for the faint of heart. And it's not it's not without risk.” (SK-B41)</i></p> <p><i>“The GJ tube bothered me but not as much as the trach did 'cause it was more in your face...It was really hard like I had to literally overcome fears because I didn't want to go in near it 'cause in my words I was grossed out by it.” (SK-7)</i></p> <p><i>“Yeah, at first when they were teaching me how to do the flush, I was very scared. I was nervous. I was really nervous because I don't want to cause my son to have an infection.” (SK-25)</i></p> <p><i>“...but at first the purpose for it wasn't very well explained. And so at first it felt like we were jumping from she was just not eating and we just had to get her back to eating. But she had done just fine before this medication change to like suddenly needing a G-tube, but it felt it felt rushed...It felt like it was coming into left field, and so we were pretty like uncertain and even resistant to it for the first few days before it got explained well, and then it was fine.” (SK-21)</i></p> |

|                                                                                                  |                                                                                  |                                                                                                                                                                                                                                                                                                                                                                                                                                                                                                                                                                                                                                                                                                                                                                                                                                                                                                                                                                                                                                                                                                                                                                                                                                                                                                                                                                                                                                  |
|--------------------------------------------------------------------------------------------------|----------------------------------------------------------------------------------|----------------------------------------------------------------------------------------------------------------------------------------------------------------------------------------------------------------------------------------------------------------------------------------------------------------------------------------------------------------------------------------------------------------------------------------------------------------------------------------------------------------------------------------------------------------------------------------------------------------------------------------------------------------------------------------------------------------------------------------------------------------------------------------------------------------------------------------------------------------------------------------------------------------------------------------------------------------------------------------------------------------------------------------------------------------------------------------------------------------------------------------------------------------------------------------------------------------------------------------------------------------------------------------------------------------------------------------------------------------------------------------------------------------------------------|
|                                                                                                  | <p>1.2 Family caregivers' attitude towards participating in training program</p> | <p><i>“At first, I didn't want to learn, but not everyone is entitled to nursing (at home), so the nurses told me you have to learn how to do it because they may not be around cause something could happen like X goes into distress or anything. So you have to learn. So I was like forced to learn. Even though I didn't want to, I had to.” (SK-7)</i></p> <p><i>“We're mere mortals, right? We're not medical professionals. To insert something into someone else's body like an NG Tube...the thought of it is a little scary and there's a lot more comfort knowing that medical professionals going to do it, someone who has inserted many in their lives. I don't want to be the one holding him down to do it. It's such an uncomfortable experience, right? What if I do it wrong? What if I stick it down as long? So many fears.” (SK-55)</i></p> <p><i>“So, I was doing a lot of trach changes at 3 1/2 years. But I really blocked this memory, and it was very hard for me to start changing the trach again. Every time...even the thought of it I would be having a panic attack. I was very, very nervous about the trach changes...So the part of taking care of the trach wasn't so bad. But actual trach changes were the worst to learn.” (SK-1)</i></p> <p><i>“There were certain points during the class where I would just break down and start crying because it's just so much.” (SK-25)</i></p> |
| <p>2. The value of education and transition support for initiation of new medical technology</p> | <p>2.1 Experience of learning medical technology</p>                             | <p><i>“I think the training was good in the sense that the information was readily available. The tools were there, the tools that were needed that X would be using were present. So I think for families, it's a comfort thing, right? Being discharged after a big procedure, stresses are high. I just believe that thorough training is important; that all the appropriate equipment was there which it was. The lady who did the training for us was fantastic. She was in no rush, we had as much time as we needed. I think the program in that sense was set up quite well for us.” (SK-29)</i></p> <p><i>“But I received all the training that I needed and then we were at the hospital a little bit longer so every time RT came with the</i></p>                                                                                                                                                                                                                                                                                                                                                                                                                                                                                                                                                                                                                                                                   |

|  |  |                                                                                                                                                                                                                                                                                                                                                                                                                                                                                                                                                                                                                                                                                                                                                                                                                                                                                                                                                                                                                                                                                                                                                                                                                                                                                                                                                                                                                                                                                                                                                                                                                                                                                                                                                                                                                                                                                                                                                                                                                                                                                      |
|--|--|--------------------------------------------------------------------------------------------------------------------------------------------------------------------------------------------------------------------------------------------------------------------------------------------------------------------------------------------------------------------------------------------------------------------------------------------------------------------------------------------------------------------------------------------------------------------------------------------------------------------------------------------------------------------------------------------------------------------------------------------------------------------------------------------------------------------------------------------------------------------------------------------------------------------------------------------------------------------------------------------------------------------------------------------------------------------------------------------------------------------------------------------------------------------------------------------------------------------------------------------------------------------------------------------------------------------------------------------------------------------------------------------------------------------------------------------------------------------------------------------------------------------------------------------------------------------------------------------------------------------------------------------------------------------------------------------------------------------------------------------------------------------------------------------------------------------------------------------------------------------------------------------------------------------------------------------------------------------------------------------------------------------------------------------------------------------------------------|
|  |  | <p>helping me out, telling me, and refreshing my memory. So I was very, very comfortable going home.” (SK-1)</p> <p>“...for me, it was really great. Because initially, it's a slide presentation about what the technology is, why he needs it, why other kids use it, quite a bit of background. And then they sort of go through it with the slides. What is happening when you're flushing, why you need to flush it, And then I need to try actually doing it on this doll.” (SK-55)</p> <p>“Well, everything about it is helpful in the sense of how to properly care for your kid, right? So the fact of just knowing what to look for, knowing how to properly use it, knowing how to properly clean it, and looking for the signs of infection are the main important things. So it was all well covered. She demonstrated everything quite well, and the brochure that she left with us was great.”(SK-29)</p> <p>“She knew we were a little bit slow and hesitant. I think I initially booked for an hour. We went well over that time, went over like two hours. She was kind and very accommodating.” (SK-B35)</p> <p>“So the classes were very helpful. Like absolutely awesome, I think those classes are amazing because even though I've done it in the past, I needed to refresh my memory. It was very helpful 'cause I got to do everything on a little doll. And then once I did everything I remembered, I know how to do that. So the part of taking care of the trach wasn't so bad.” (SK-1)</p> <p>“I think it would be nice to have like a visual or pamphlet, or something just in case something were to happen, I know we have the write-up of it but just, a quick reference or even something to be like, oh, you want to go back through the training and make sure we remember everything.” (SK-23)</p> <p>“Oh, it was a lot to be honest. At one point like, in one session, I feel like as a mom, you know, you're already in different environments. Right? So grabbing all that information in one session, to be honest, was a lot.”(SK-1)</p> |
|--|--|--------------------------------------------------------------------------------------------------------------------------------------------------------------------------------------------------------------------------------------------------------------------------------------------------------------------------------------------------------------------------------------------------------------------------------------------------------------------------------------------------------------------------------------------------------------------------------------------------------------------------------------------------------------------------------------------------------------------------------------------------------------------------------------------------------------------------------------------------------------------------------------------------------------------------------------------------------------------------------------------------------------------------------------------------------------------------------------------------------------------------------------------------------------------------------------------------------------------------------------------------------------------------------------------------------------------------------------------------------------------------------------------------------------------------------------------------------------------------------------------------------------------------------------------------------------------------------------------------------------------------------------------------------------------------------------------------------------------------------------------------------------------------------------------------------------------------------------------------------------------------------------------------------------------------------------------------------------------------------------------------------------------------------------------------------------------------------------|

|                                                                                      |                                                                                         |                                                                                                                                                                                                                                                                                                                                                                                                                                                                                                                                                                                                                                                                                                                                                                                                                                                                                                                                                                                                                                                                                                                                                                                                                                                                                                                                                                                                                                                                                                                                                                                                                                                    |
|--------------------------------------------------------------------------------------|-----------------------------------------------------------------------------------------|----------------------------------------------------------------------------------------------------------------------------------------------------------------------------------------------------------------------------------------------------------------------------------------------------------------------------------------------------------------------------------------------------------------------------------------------------------------------------------------------------------------------------------------------------------------------------------------------------------------------------------------------------------------------------------------------------------------------------------------------------------------------------------------------------------------------------------------------------------------------------------------------------------------------------------------------------------------------------------------------------------------------------------------------------------------------------------------------------------------------------------------------------------------------------------------------------------------------------------------------------------------------------------------------------------------------------------------------------------------------------------------------------------------------------------------------------------------------------------------------------------------------------------------------------------------------------------------------------------------------------------------------------|
|                                                                                      | <p>2.2 Access to education and transition support for medical technology management</p> | <p><i>"I think the pandemic has given us the opportunity to like Zoom, for instance...Just like, send an email, hey, I'm having a complication. Then, they're like, hey, I got a Zoom link let me have a peek. Do you know what I mean? Troubleshoot it with those families online and then they can be like, yeah, this is something that you should probably make your way down to X for." (SK-29)</i></p> <p><i>"It seems like they train the parents, and unfortunately with COVID, I know there's, a limit. But, even like, if they could do like virtual classes for like, you know, like say for my sister or for X, so, they'd know a little bit more about it." (SK-23)</i></p> <p><i>"The other thing that was done that I wish was that every month, every at least three months, someone can check up on you, you know what I mean? Hey, how are you doing? How's everything doing? Do you need any help? Like, how do you feel about it... just making sure the parent is not overwhelmed. You know, I mean, and also the parent is still on the same page with the training or updated and just keep on trial that the parent is doing well with a child. (SK-51)</i></p> <p><i>"Having somebody come in and actually take a look, make sure that you do it right, in the first weeks...Because you want to get a second opinion, from a professional. Me, being like the first time doing this. You always have this question in the back of your head, did I do anything right? And like I would then look over the checklist over the checklist once or twice or three times, making sure that you do it right." (SK-B35)</i></p> |
| <p>3. The challenges associated with managing new medical technology in the home</p> | <p>3.1 The initial transition home</p>                                                  | <p><i>"Yeah, it's one it's definitely a totally different thing when you're in the hospital setting, But just coming home it was it was a nightmare." (SK-B41)</i></p> <p><i>"...like he's just home from the hospital. I don't know, like, you don't even, like you go from having 24/7 care. Like anything happens like a nurse runs in, so when you're at home and it's like, okay, like I know, they gave me all the information of who to call and what to call like, you're like, 'am I calling the right person, who am I like who supposed to reach out to?'" (SK-B41)</i></p>                                                                                                                                                                                                                                                                                                                                                                                                                                                                                                                                                                                                                                                                                                                                                                                                                                                                                                                                                                                                                                                             |

|  |                                                                            |                                                                                                                                                                                                                                                                                                                                                                                                                                                                                                                                                                                                                                                                                                                                                                                                                                                                                                                                                                                                                                                                                                                                                                                                                                                                                                                                   |
|--|----------------------------------------------------------------------------|-----------------------------------------------------------------------------------------------------------------------------------------------------------------------------------------------------------------------------------------------------------------------------------------------------------------------------------------------------------------------------------------------------------------------------------------------------------------------------------------------------------------------------------------------------------------------------------------------------------------------------------------------------------------------------------------------------------------------------------------------------------------------------------------------------------------------------------------------------------------------------------------------------------------------------------------------------------------------------------------------------------------------------------------------------------------------------------------------------------------------------------------------------------------------------------------------------------------------------------------------------------------------------------------------------------------------------------|
|  |                                                                            | <p>“The other challenge at home was I have another 18 month old Another child that I was afraid would kinda grab at it. And so we had to make arrangements for that which she was always higher up that he couldn't reach her but sometimes we would hold her and then my other child could probably come in and pull the tube out...That fear was was there. Keep him away. So always under 24/7 kind of being aware of his presence near the baby. That was a challenge for us.” (SK-B35)</p> <p>“And we were told that the (homecare) nurse would come on the daily to do the hep-locking and to change his bandage on a weekly basis. We were told that that same day that we got home supplies would be delivered. Yeah, well fast forward to the day after we were home and I'm waiting for the hep-locks, no contact with anybody. We didn't get any materials and we didn't get any nursing care. So the entire time that he was home with the line, we didn't have a nurse come at all, because there was a nursing shortage.” (SK-B41)</p> <p>“So what was eight to 10 hours, like just looking during the day, just making sure it is not pulling anything that he's not touching and making sure he's not throwing up. Making sure that the tube is not out. I was going so crazy about it to be honest.” (SK-51)</p> |
|  | <p>3.2 Difficulties dealing with emergencies and medical complications</p> | <p>“I think that probably the one thing that we felt unprepared for was how frequent infections could be. So I think that it would be helpful to have a little bit more information. Since the G-tube was inserted, [child] has had three site infections. For us, it feels like a massive failure in terms of managing even though we're doing everything we should be doing.” (SK-21)</p> <p>“Yeah, like I've never done a cap change before. Then, one day he needed it to be done, I couldn't flush his line and I couldn't get blood return because the cap was still f***** up. So I turned to my husband, I was like, I've got to do it. I've seen it done 1000 times. I can do it. I was just really nervous about it because what if I mess up.” (SK-25)</p>                                                                                                                                                                                                                                                                                                                                                                                                                                                                                                                                                             |

Confidential: For Review Only



|  |                                                                             |                                                                                                                                                                                                                                                                                                                                                                                                                                                                                                                                                                                                                                                                                                                                                                                                                                                                                                                                                                                                                                                                                                                                                                                                                                                                                                                                                                                                                                                                                                                                                                                          |
|--|-----------------------------------------------------------------------------|------------------------------------------------------------------------------------------------------------------------------------------------------------------------------------------------------------------------------------------------------------------------------------------------------------------------------------------------------------------------------------------------------------------------------------------------------------------------------------------------------------------------------------------------------------------------------------------------------------------------------------------------------------------------------------------------------------------------------------------------------------------------------------------------------------------------------------------------------------------------------------------------------------------------------------------------------------------------------------------------------------------------------------------------------------------------------------------------------------------------------------------------------------------------------------------------------------------------------------------------------------------------------------------------------------------------------------------------------------------------------------------------------------------------------------------------------------------------------------------------------------------------------------------------------------------------------------------|
|  |                                                                             | <p><i>“Whereas, I wish there was a direct line to someone on call...I know there's a lot of kids that have PICC lines at X, but someone part of the discharge team that we could call and say this is the scenario we're running into right now, can we troubleshoot this with you? Or should we come down? Just because we live at a great distance, a couple of hours away, right? So, for us to go down and go to the emergency room and have them check it, and then it'd be something so simple. That's four hours, and the gas involved in the time and dragging me out in the middle of the pandemic and stuff.” (SK-29)</i></p> <p><i>“Yeah, like I've never done a cap change before. Then, one day he needed it to be done, I couldn't flush his line and I couldn't get blood return because the cap was still f***** up. So I turned to my husband, I was like, I've got to do it. I've seen it done 1000 times. I can do it. I was just really nervous about it because what if I mess up.” (SK-25)</i></p> <p><i>“like nobody was answering that was on top of the stress like I couldn't get ahold of anyone. It's like press zero if you if it's urgent I kept pressing zero and I would get voicemail no matter what I did I would get voicemail.” (SK-B41)</i></p> <p><i>“I do wish, as I said before, if we had someone more direct to reach out to that was part of that team of people who did the training. That were part of the discharge, I think that would be more helpful for someone like me, I can troubleshoot and we can figure it out.” (SK-29)</i></p> |
|  | <p>3.3 Increased emotional and financial burden among family caregivers</p> | <p><i>“I get up at 6:00 o'clock. Then it's either me or the nurse that starts the feed, it depends. If the nurse is here, because we only have her for four nights, then she starts the meds and his feed. When she's not here, it's all up to me. And she will do the diaper change also. But I get up and I'll do the sponge bath for him before he goes to school. I do the trach care when she's not here because I'm usually sleeping. So I have to do the trach care so the dressing and change the inner cannula, and then I dressed him up. And I put him to the wheelchair, and then I have to prepare his feed for lunch for the school and make sure that he has all his emergency app</i></p>                                                                                                                                                                                                                                                                                                                                                                                                                                                                                                                                                                                                                                                                                                                                                                                                                                                                                |

|  |  |                                                                                                                                                                                                                                                                                                                                                                                                                                                                                                                                                                                                                                                                                                                                                                                                                                                                                                                                                                                                                                                                                                                                                                                                                                                                                                                                                                                                                                                                                                                                                                                                                                                                                                                                                                                                                                                                                                                                                                                                                                                                                                                                                                                             |
|--|--|---------------------------------------------------------------------------------------------------------------------------------------------------------------------------------------------------------------------------------------------------------------------------------------------------------------------------------------------------------------------------------------------------------------------------------------------------------------------------------------------------------------------------------------------------------------------------------------------------------------------------------------------------------------------------------------------------------------------------------------------------------------------------------------------------------------------------------------------------------------------------------------------------------------------------------------------------------------------------------------------------------------------------------------------------------------------------------------------------------------------------------------------------------------------------------------------------------------------------------------------------------------------------------------------------------------------------------------------------------------------------------------------------------------------------------------------------------------------------------------------------------------------------------------------------------------------------------------------------------------------------------------------------------------------------------------------------------------------------------------------------------------------------------------------------------------------------------------------------------------------------------------------------------------------------------------------------------------------------------------------------------------------------------------------------------------------------------------------------------------------------------------------------------------------------------------------|
|  |  | <p>which is the trach and the G tube line with him. Make sure that his backpack is filled with catheters, suction catheter, and Younkers, syringes, dressings, and then he also needs his oxygen tank with him and oximeter, and of course his suction machine and a ventilator. Then we wait for the school nurse to show up and then she goes on the bus with him and she goes to school with SK1." (SK-1)</p> <p>"I think we're probably pretty burnt out. I think that would be fair to say that we're very burnt out. And also it's worth it. So you know SK-21 is so much healthier with her technology than without it that it's worth it to do it and we're burnt out." (SK-21)</p> <p>"My life changed a lot too. I was always a caregiver because X was always disabled but before he didn't require 24 hour watch. I could leave him with one of my son's or my daughter-in-law. I could be gone all day and she could be taking care of him like a regular child. With X having a tracheostomy, I can only leave him with a nurse or another person who's trained. (SK-1)</p> <p>"I always feel like I'm running around like a chicken with their head cut off. I'm running from one area to another area, maintain a household, cook, clean and watch him. So it's just like, my sanity is when I go to bed at night. That's my time. But during the day it's literally chaos. Like if he's throwing up, then I have to think "why are you throwing up, was it too much feed?". You know you're always questioning and second guessing yourself. It's a lot of work, it really is." (SK-7)</p> <p>"It's parents like me that are falling through the cracks, and it's just like, we're just waiting for mom to have a mental break for her to just lose her mind. It's gotten close. It's really close to the point where I just want to put my kid in his room with his toys, close the door, and just sit outside for 20 minutes." (SK-25)</p> <p>"Where do I start? We don't have enough funding. There's nothing for caregivers. For example, I'm a single parent. I can't work really. It's very difficult for me to find employment and there's no financial support</p> |
|--|--|---------------------------------------------------------------------------------------------------------------------------------------------------------------------------------------------------------------------------------------------------------------------------------------------------------------------------------------------------------------------------------------------------------------------------------------------------------------------------------------------------------------------------------------------------------------------------------------------------------------------------------------------------------------------------------------------------------------------------------------------------------------------------------------------------------------------------------------------------------------------------------------------------------------------------------------------------------------------------------------------------------------------------------------------------------------------------------------------------------------------------------------------------------------------------------------------------------------------------------------------------------------------------------------------------------------------------------------------------------------------------------------------------------------------------------------------------------------------------------------------------------------------------------------------------------------------------------------------------------------------------------------------------------------------------------------------------------------------------------------------------------------------------------------------------------------------------------------------------------------------------------------------------------------------------------------------------------------------------------------------------------------------------------------------------------------------------------------------------------------------------------------------------------------------------------------------|

1  
2  
3  
4  
5  
6  
7  
8  
9  
10  
11  
12  
13  
14  
15  
16  
17  
18  
19  
20  
21  
22  
23  
24  
25  
26  
27  
28  
29  
30  
31  
32  
33  
34  
35  
36  
37  
38  
39  
40  
41  
42  
43  
44  
45  
46  
47  
48  
49  
50  
51  
52  
53  
54  
55  
56  
57  
58  
59  
60

|  |  |                                                                                                                                                                                                                                                                                                                 |
|--|--|-----------------------------------------------------------------------------------------------------------------------------------------------------------------------------------------------------------------------------------------------------------------------------------------------------------------|
|  |  | <p><i>for caregivers. Zero. Then another thing, medical supplies are very expensive. I still cannot get the grants for medical supplies. It takes forever and we left the hospital in May. In order to get medical supplies, I have to borrow money from my family and max out my credit cards.” (SK-1)</i></p> |
|--|--|-----------------------------------------------------------------------------------------------------------------------------------------------------------------------------------------------------------------------------------------------------------------------------------------------------------------|

Confidential: For Review Only
